# Supplementary material for: Dissymmetric gold(i) N-heterocyclic carbene complexes: a key unexpected structural parameter for highly efficient catalysts in the addition of alcohols to internal alkynes
Source: Royal Society of Chemistry journal article supplement (doi:10.1039/c0dt00932f), 2011-01-01
Supplement: c0dt00932f.pdf [file c0dt00932f.pdf]

## Supporting information

### Dissymmetric gold(I) N-heterocyclic carbene complexes: a key unexpected structural parameter for highly efficient catalysts in the addition of alcohols to internal alkynes

#### Synthesis of 1-(propyl)-3-(mesityl)imidazolium iodide [1]

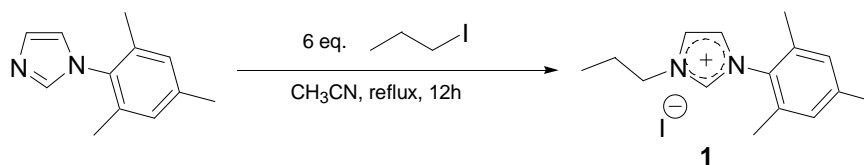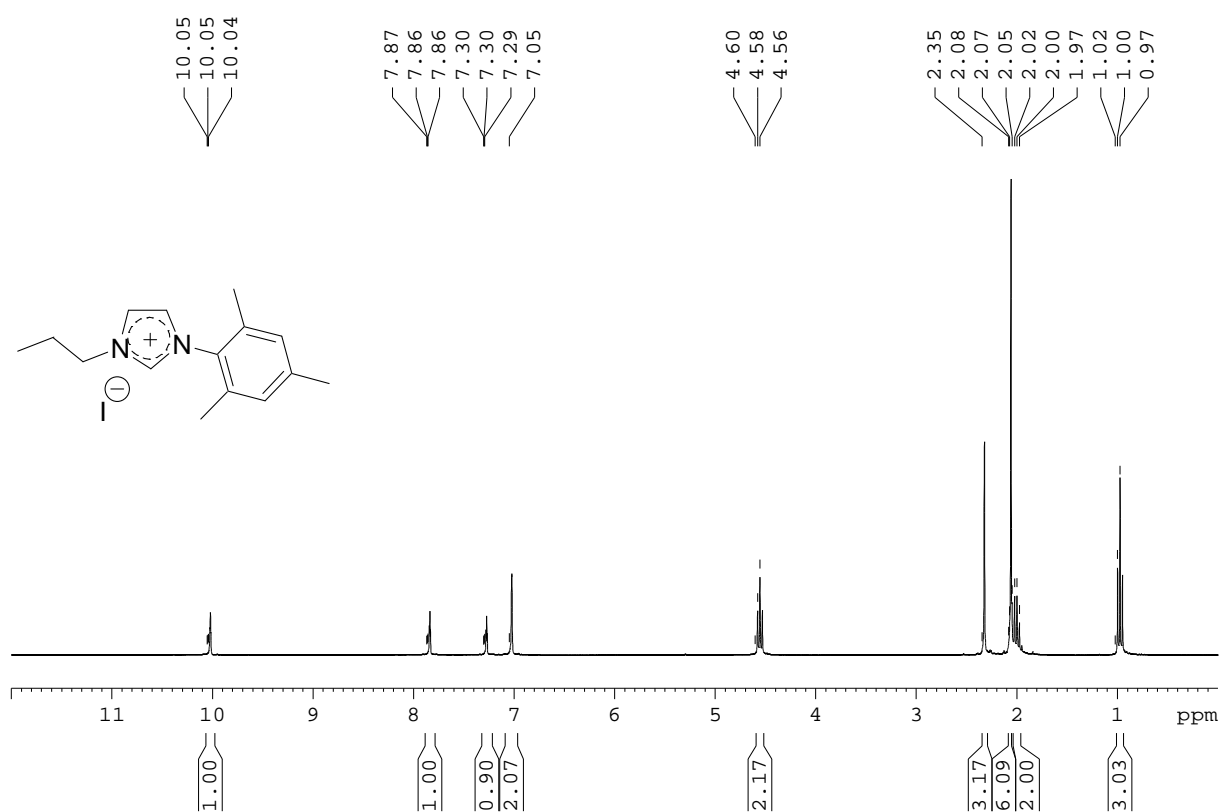

Figure S1 :  $^1\text{H}$  NMR spectra of 1.

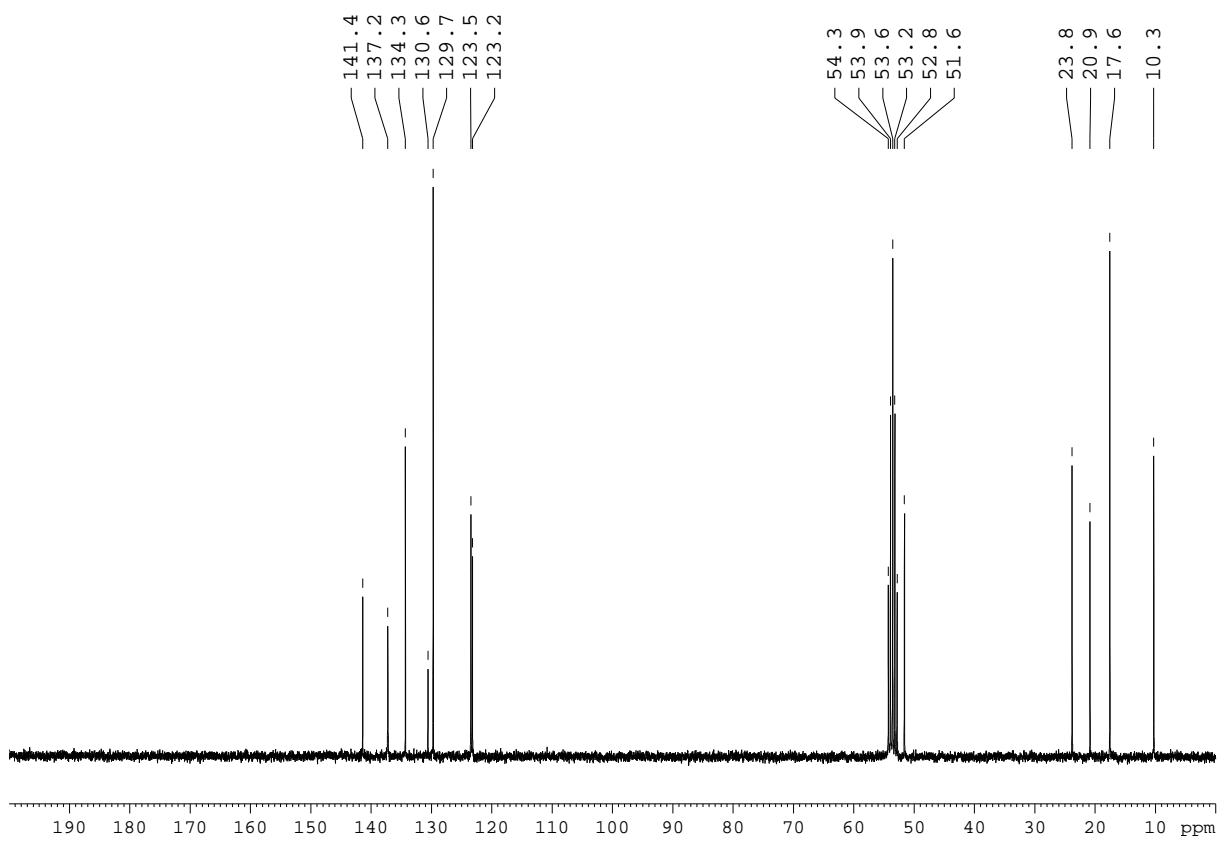

Figure S2 :  $^{13}\text{C}$  NMR spectra of 1.

### Synthesis of Silver (1-(propyl)-3-(mesityl)imidazol-2-ylidene) iodide [1-Ag]

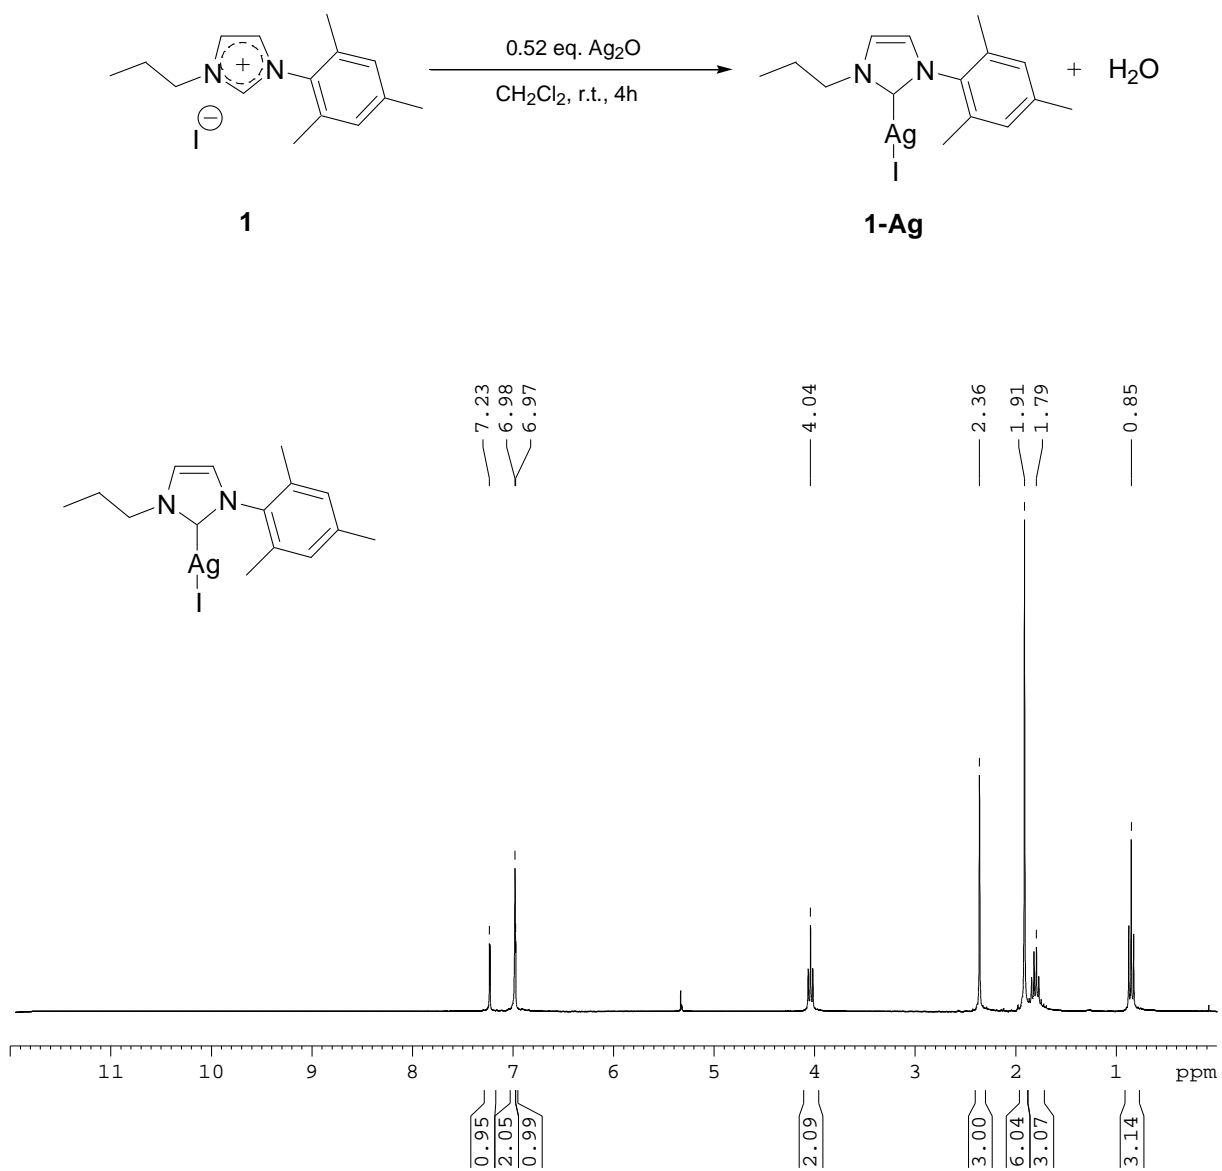

Figure S3 :  $^1\text{H}$  NMR spectra of **1-Ag**.

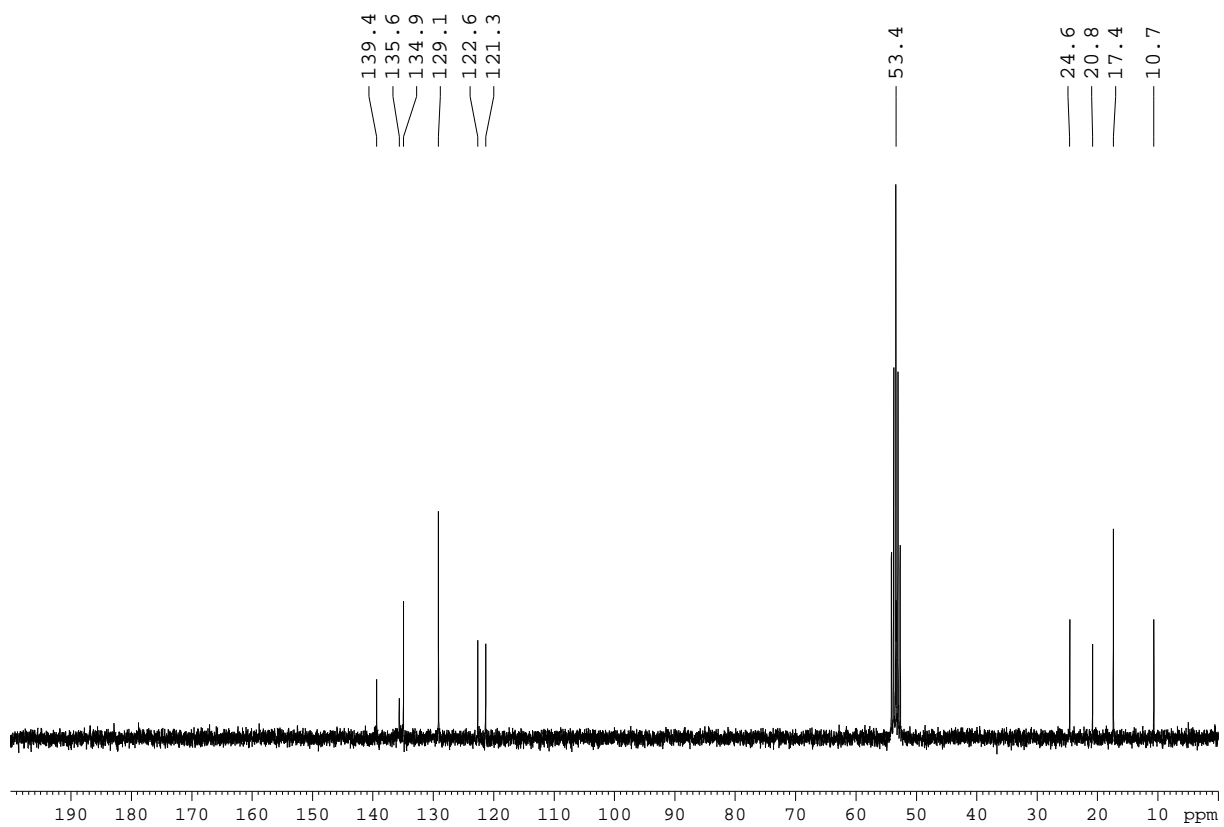

Figure S4 :  $^{13}\text{C}$  NMR spectra of 1-Ag.

## Synthesis of Gold (1-(propyl)-3-(mesityl)imidazol-2-ylidene) iodide [1-Au]

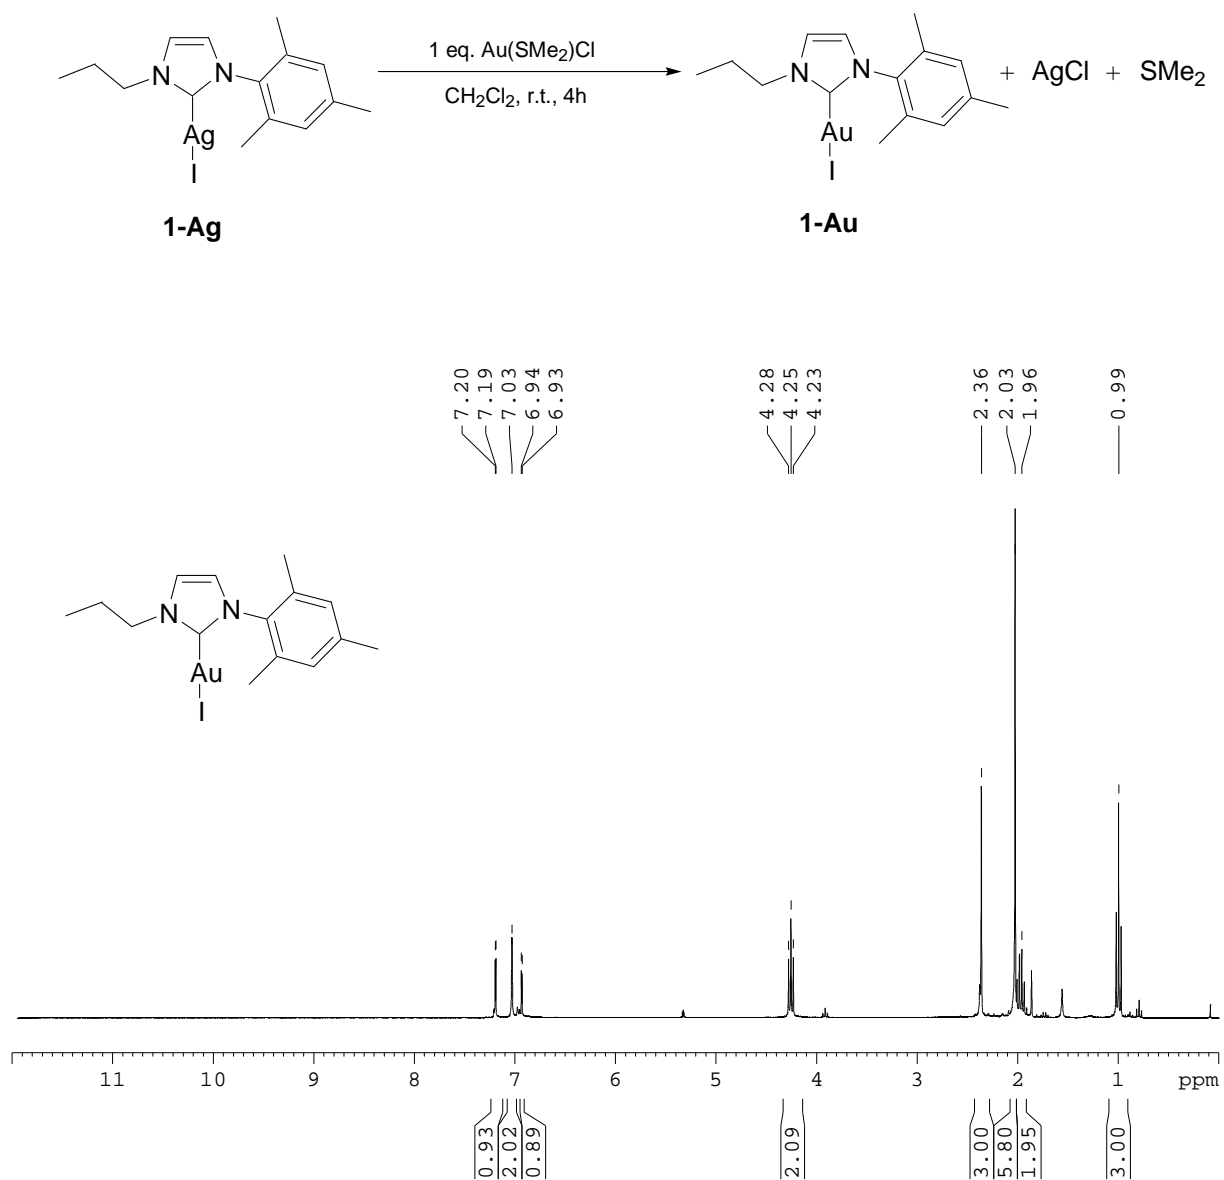

Figure S5 : <sup>1</sup>H NMR spectra of 1-Au.

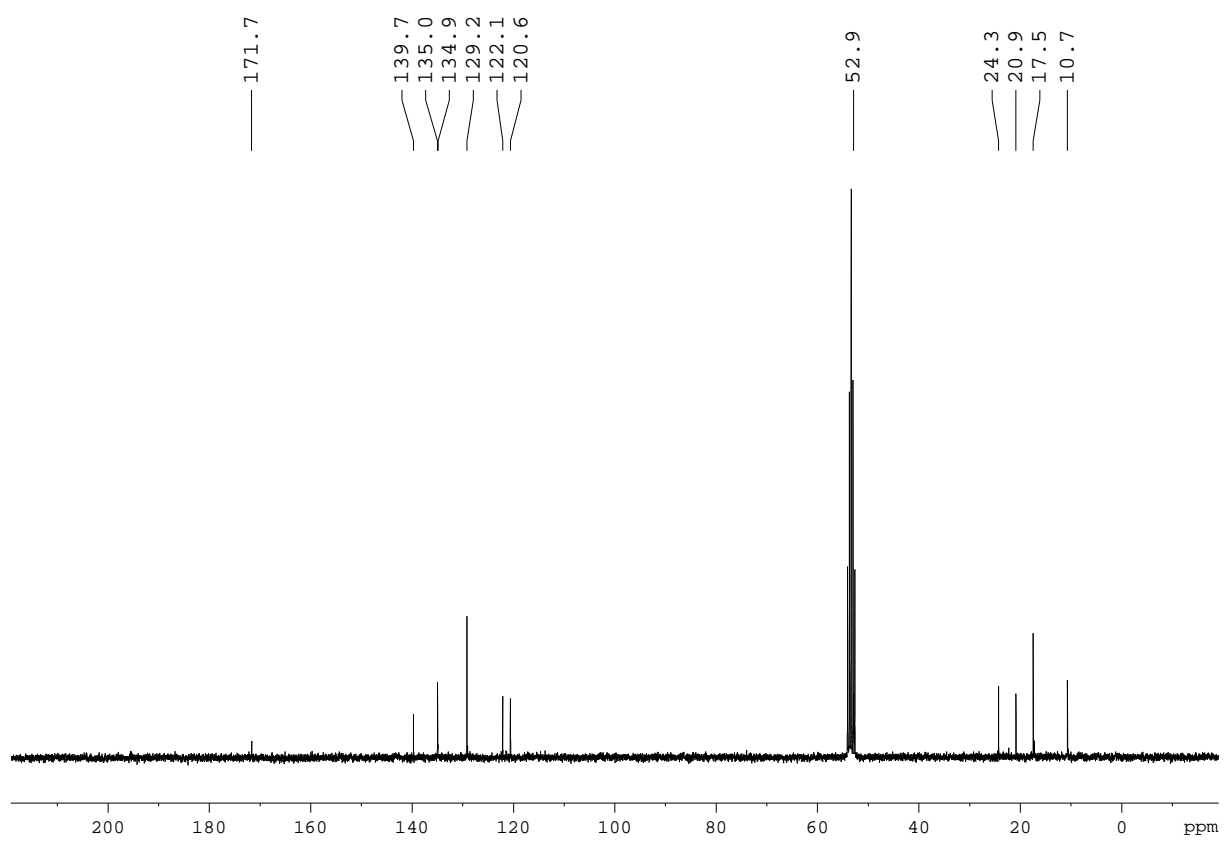

Figure S6 :  $^{13}\text{C}$  NMR spectra of 1-Au.

## Synthesis of 1-(benzyl)-3-(mesityl)imidazolium chloride [2]

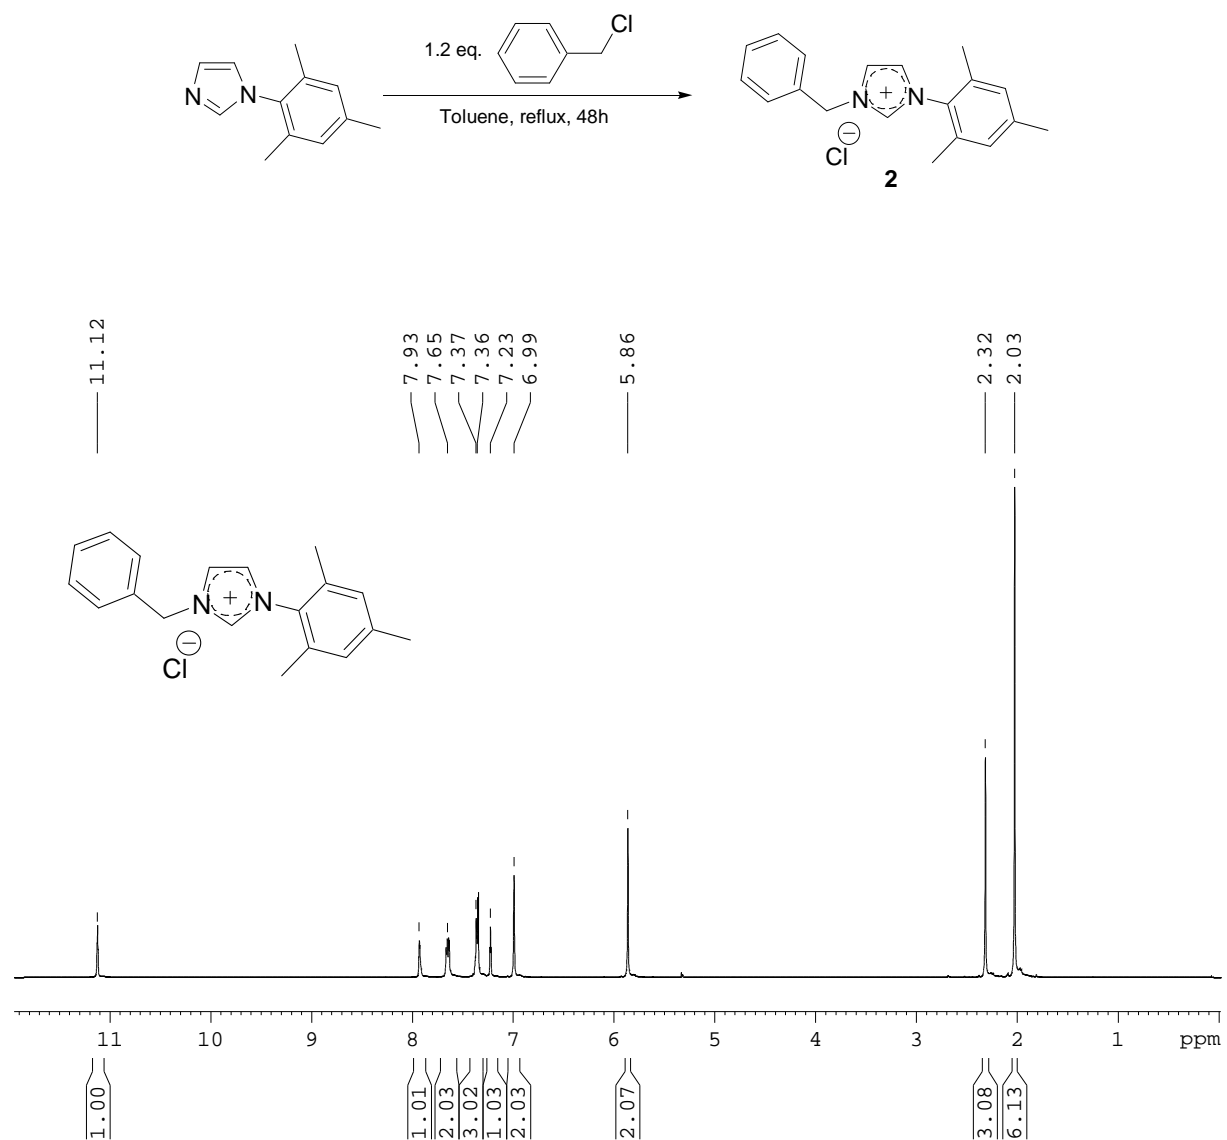

Figure S7 :  $^1\text{H}$  NMR spectra of 2.

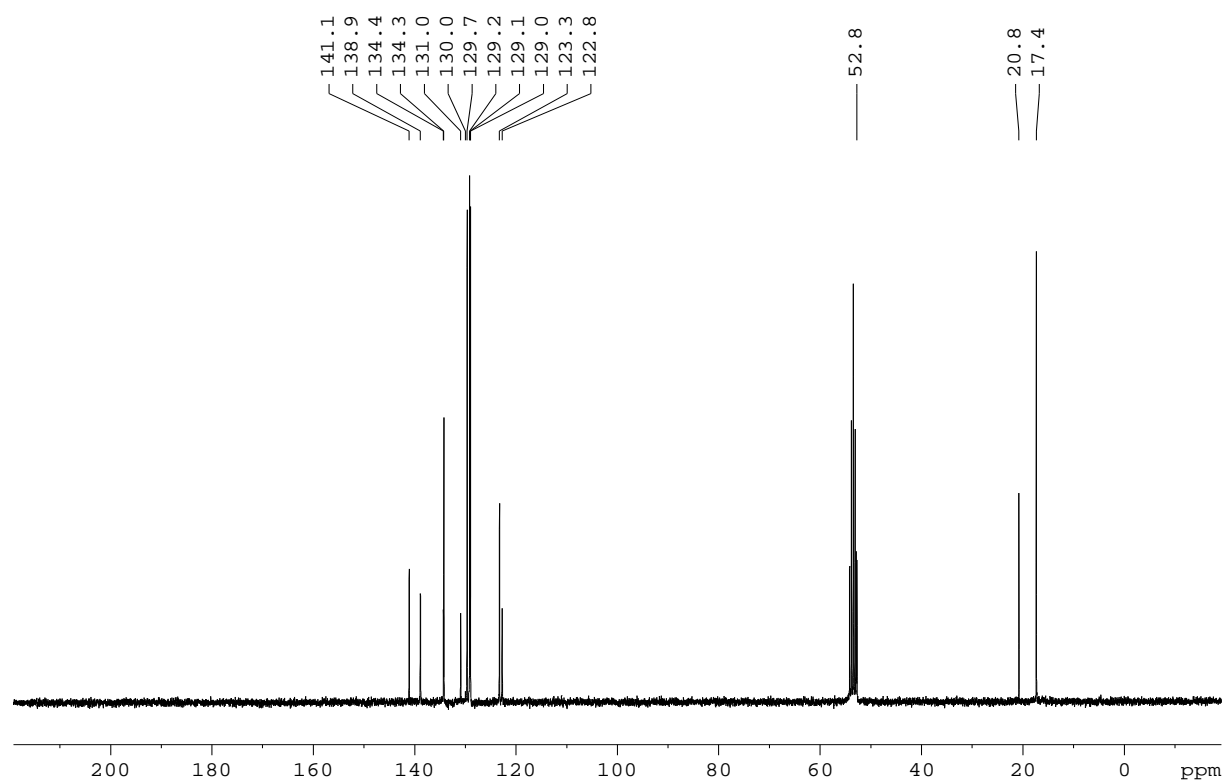

Figure S8 :  $^{13}\text{C}$  NMR spectra of 2.



### Synthesis of Silver(1-(benzyl)-3-(mesityl)imidazol-2-ylidene) chloride [2-Ag]

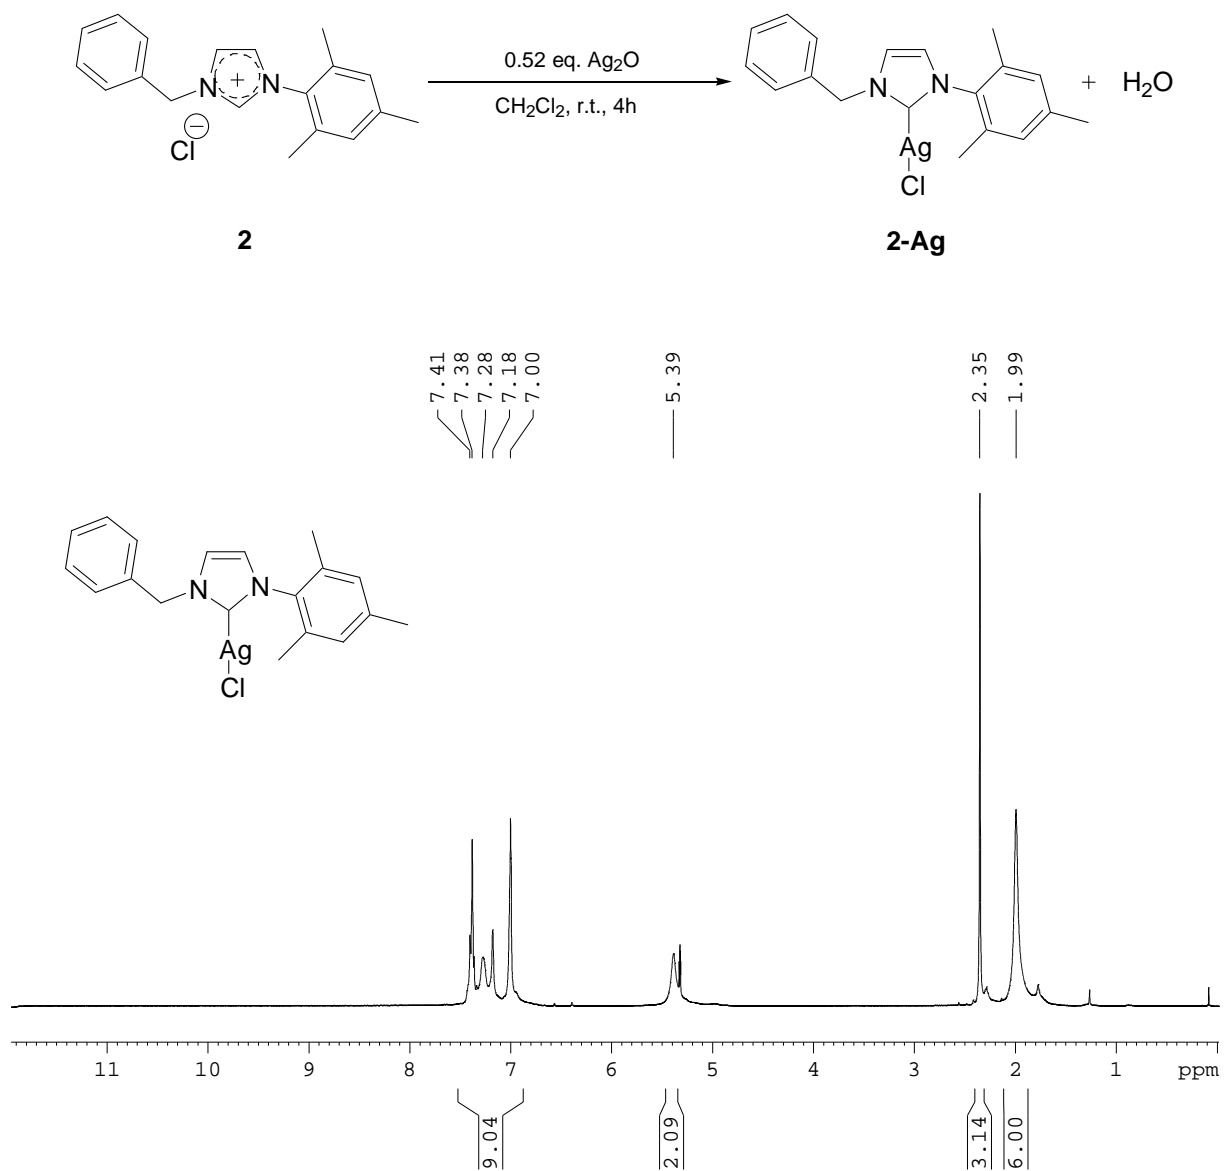

Figure S9 :  $^1\text{H}$  NMR spectra of **2-Ag**.

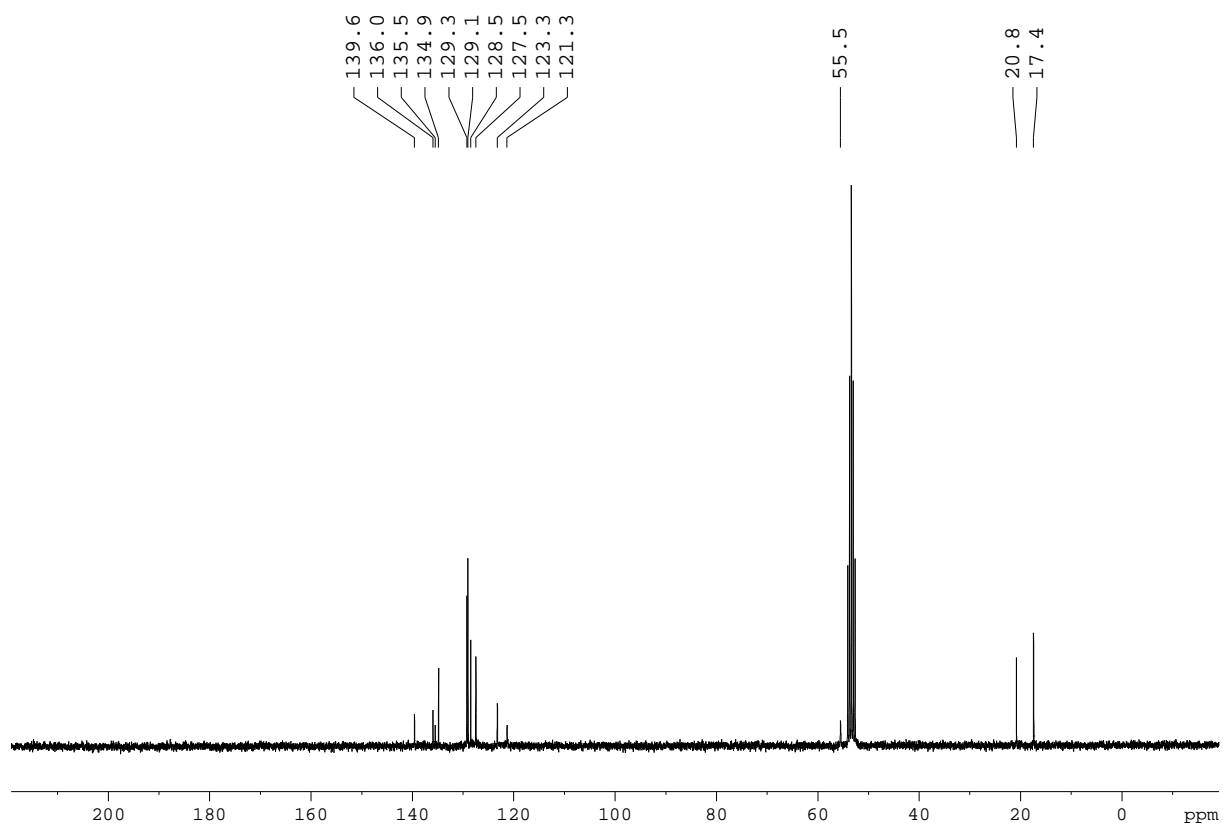

Figure S10 :  $^{13}\text{C}$  NMR spectra of 2-Ag.

### Synthesis of Gold (1-(benzyl)-3-(mesityl)imidazol-2-ylidene) chloride [2-Au]

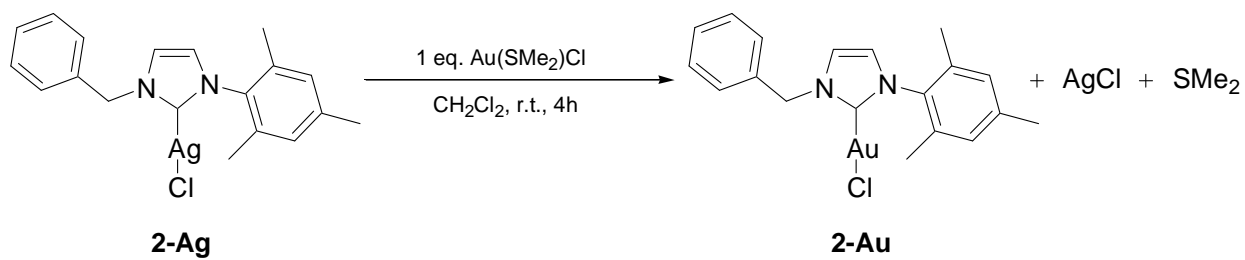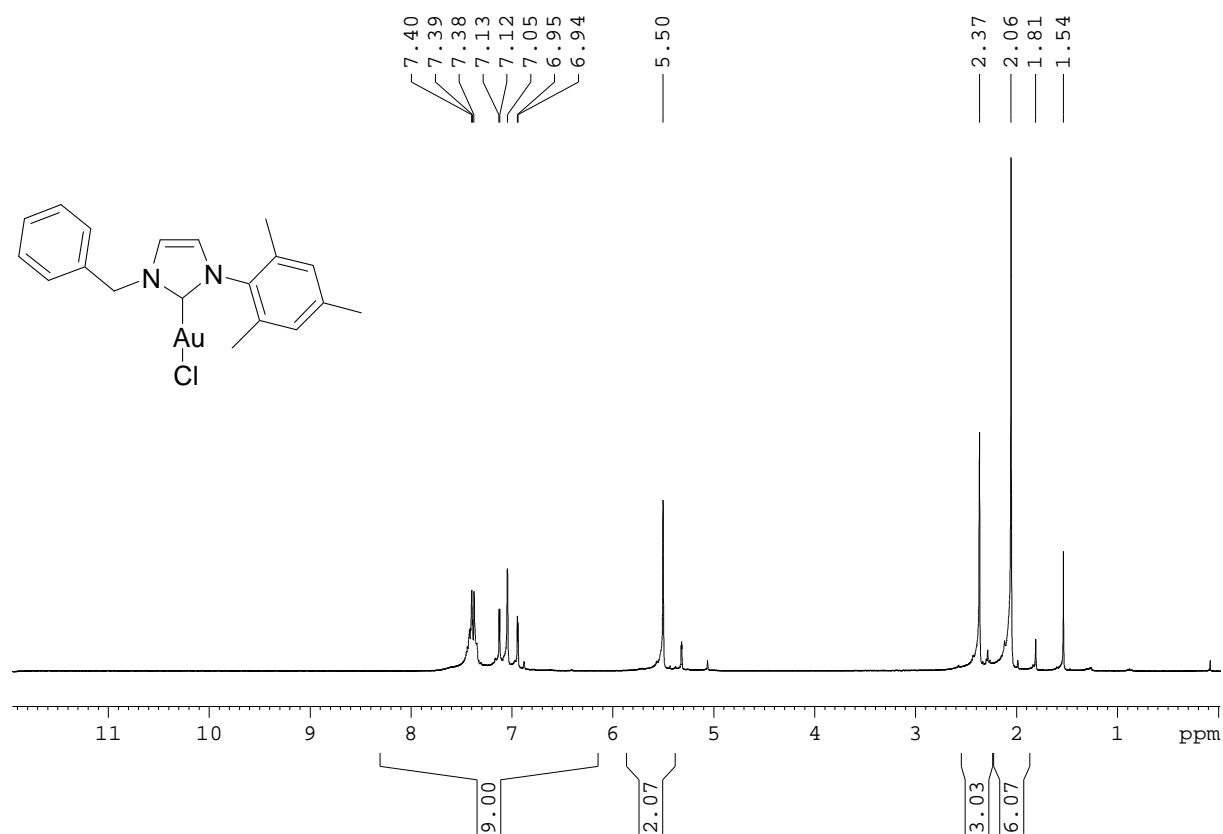

Figure S12 : <sup>1</sup>H NMR spectra of 2-Au.

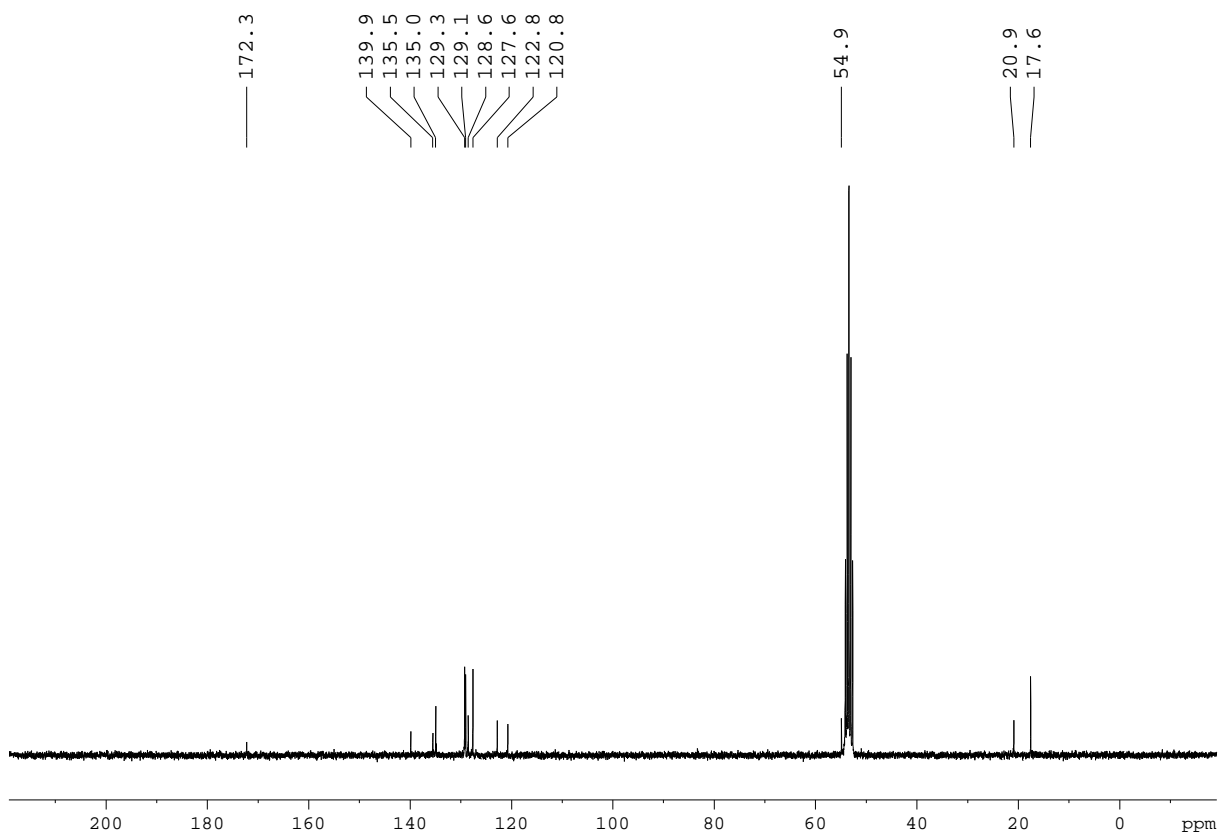

Figure S13 :  $^{13}\text{C}$  NMR spectra of 2-Au.

Table S1 : Crystal Data and Experimental Details for 2-Au.

*Crystal data*

|                                            |                                       |
|--------------------------------------------|---------------------------------------|
| $\text{C}_{19}\text{H}_{20}\text{AuClN}_2$ | $Z = 2$                               |
| $M_r = 508.80$                             | $D_x = 1.850 \text{ Mg m}^{-3}$       |
| Monoclinic, $P1c1$                         | Mo $K\alpha$ radiation                |
| $a = 9.4696 (2) \text{ \AA}$               | Cell parameters from 2284 reflections |
| $b = 11.5952 (2) \text{ \AA}$              | $\theta = 0.7\text{--}27.9^\circ$     |
| $c = 9.5469 (2) \text{ \AA}$               | $\mu = 8.20 \text{ mm}^{-1}$          |
| $\beta = 119.3890 (10)^\circ$              | $T = 293 \text{ K}$                   |
| $V = 913.36 (3) \text{ \AA}^3$             | Block, colorless                      |

*Data collection*

|                                                                            |                                          |
|----------------------------------------------------------------------------|------------------------------------------|
| Nonius KappaCCD diffractometer                                             | 3785 reflections with $I > 2.0\sigma(I)$ |
| $\phi$ & $\omega$ scans                                                    | $R_{\text{int}} = 0.000$                 |
| Absorption correction: multi-scan (based on symmetry-related measurements) | $\theta_{\text{max}} = 27.9^\circ$       |
| $T_{\text{min}} = 0.05, T_{\text{max}} = 0.14$                             | $h = -12 \rightarrow 12$                 |
| 3881 measured reflections                                                  | $k = 0 \rightarrow 15$                   |
| 3881 independent reflections                                               | $l = -12 \rightarrow 12$                 |

### Refinement

|                                 |                                                                                                                                         |
|---------------------------------|-----------------------------------------------------------------------------------------------------------------------------------------|
| Refinement on $F^2$             | No H atoms present                                                                                                                      |
| $R[F^2 > 2\sigma(F^2)] = 0.022$ | Calculated weights Method = Modified<br>Sheldrick $w = 1/[\sigma^2(F^2) + (0.05P)^2 + 1.02P]$ , where $P = (\max(F_o^2, 0) + 2F_c^2)/3$ |
| $wR(F^2) = 0.057$               | $(\Delta/\sigma)_{\max} = 0.001$                                                                                                        |
| $S = 1.27$                      | $\Delta\rho_{\max} = 0.89 \text{ e } \text{\AA}^{-1}$                                                                                   |
| 3873 reflections                | $\Delta\rho_{\min} = -1.78 \text{ e } \text{\AA}^{-1}$                                                                                  |
| 210 parameters                  | Extinction correction: None                                                                                                             |

### Geometric parameters ( $\text{\AA}$ , $^\circ$ ) for 1

|             |             |             |            |
|-------------|-------------|-------------|------------|
| Au1—C12     | 2.2815 (17) | C12—C13     | 1.337 (9)  |
| Au1—C3      | 1.953 (7)   | C13—N14     | 1.380 (6)  |
| C3—N4       | 1.373 (7)   | N14—C15     | 1.444 (7)  |
| C3—N14      | 1.336 (8)   | C15—C16     | 1.405 (7)  |
| N4—C5       | 1.462 (7)   | C15—C20     | 1.394 (8)  |
| N4—C12      | 1.389 (7)   | C16—C17     | 1.397 (11) |
| C5—C6       | 1.513 (8)   | C16—C23     | 1.500 (12) |
| C6—C7       | 1.378 (8)   | C17—C18     | 1.354 (14) |
| C6—C11      | 1.397 (7)   | C18—C19     | 1.387 (10) |
| C7—C8       | 1.396 (8)   | C18—C22     | 1.520 (9)  |
| C8—C9       | 1.392 (9)   | C19—C20     | 1.405 (8)  |
| C9—C10      | 1.378 (9)   | C20—C21     | 1.495 (8)  |
| C10—C11     | 1.370 (8)   |             |            |
| C12—Au1—C3  | 178.7 (2)   | C13—N14—C3  | 112.6 (5)  |
| Au1—C3—N4   | 126.7 (5)   | C13—N14—C15 | 122.8 (4)  |
| Au1—C3—N14  | 130.0 (4)   | C3—N14—C15  | 124.6 (4)  |
| N4—C3—N14   | 103.2 (5)   | N14—C15—C16 | 119.7 (5)  |
| C3—N4—C5    | 125.8 (5)   | N14—C15—C20 | 117.9 (4)  |
| C3—N4—C12   | 111.2 (5)   | C16—C15—C20 | 122.3 (6)  |
| C5—N4—C12   | 122.8 (5)   | C15—C16—C17 | 117.7 (7)  |
| N4—C5—C6    | 111.8 (4)   | C15—C16—C23 | 119.6 (7)  |
| C5—C6—C7    | 120.4 (5)   | C17—C16—C23 | 122.7 (8)  |
| C5—C6—C11   | 120.5 (5)   | C16—C17—C18 | 121.7 (8)  |
| C7—C6—C11   | 119.1 (5)   | C17—C18—C19 | 119.8 (6)  |
| C6—C7—C8    | 120.7 (5)   | C17—C18—C22 | 120.5 (8)  |
| C7—C8—C9    | 119.5 (5)   | C19—C18—C22 | 119.7 (9)  |
| C8—C9—C10   | 119.3 (6)   | C18—C19—C20 | 121.8 (7)  |
| C9—C10—C11  | 121.3 (6)   | C19—C20—C15 | 116.7 (5)  |
| C6—C11—C10  | 120.1 (5)   | C19—C20—C21 | 121.0 (6)  |
| N4—C12—C13  | 106.3 (5)   | C15—C20—C21 | 122.2 (5)  |
| C12—C13—N14 | 106.7 (5)   |             |            |

### Synthesis of N,N'-bis(propyl)imidazolium iodide [3]

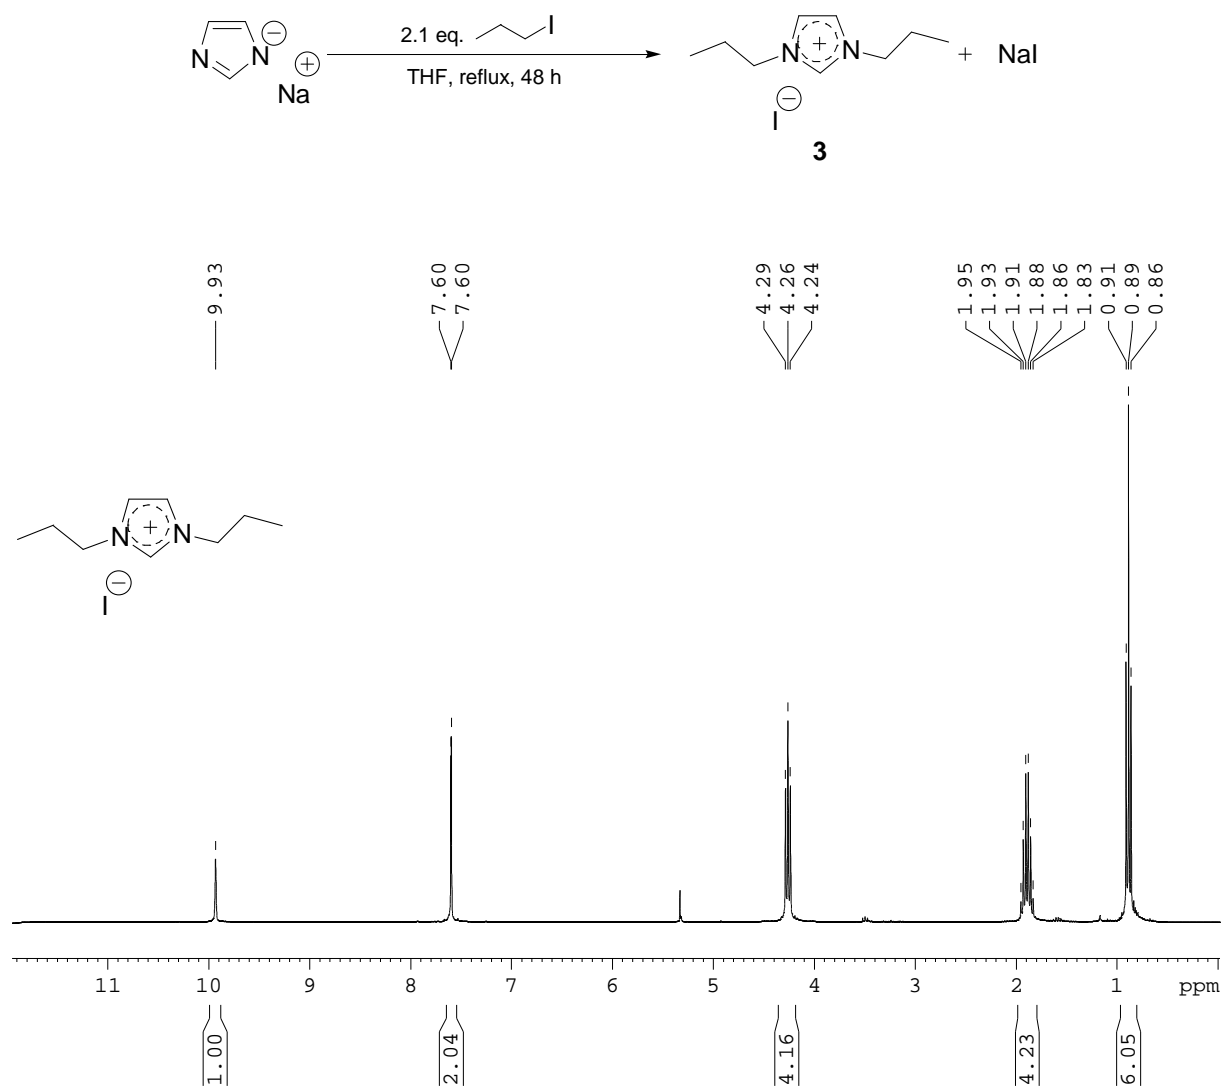

Figure S14 : <sup>1</sup>H NMR spectra of **3**.

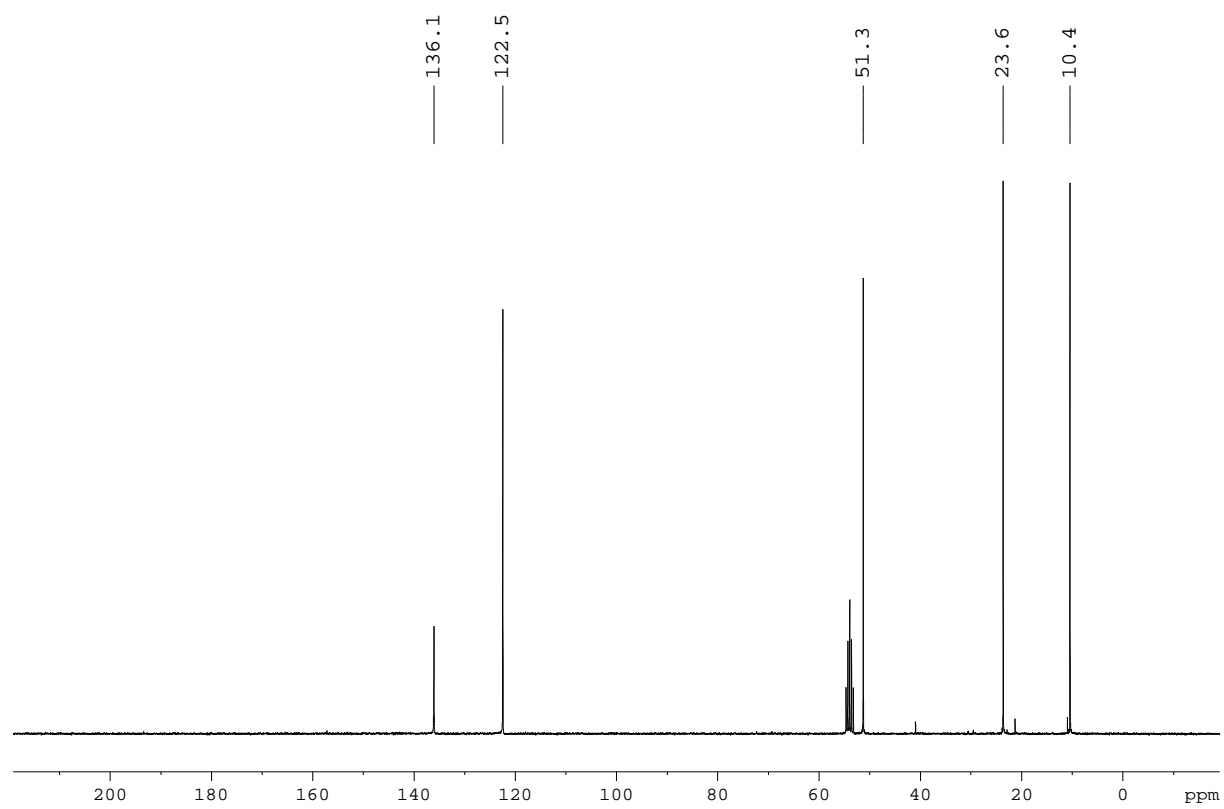

figure S15 :  $^{13}\text{C}$  NMR spectra of 3.

### Synthesis of Silver (N,N'-bis(propyl)imidazol-2-ylidene) iodide [3-Ag]

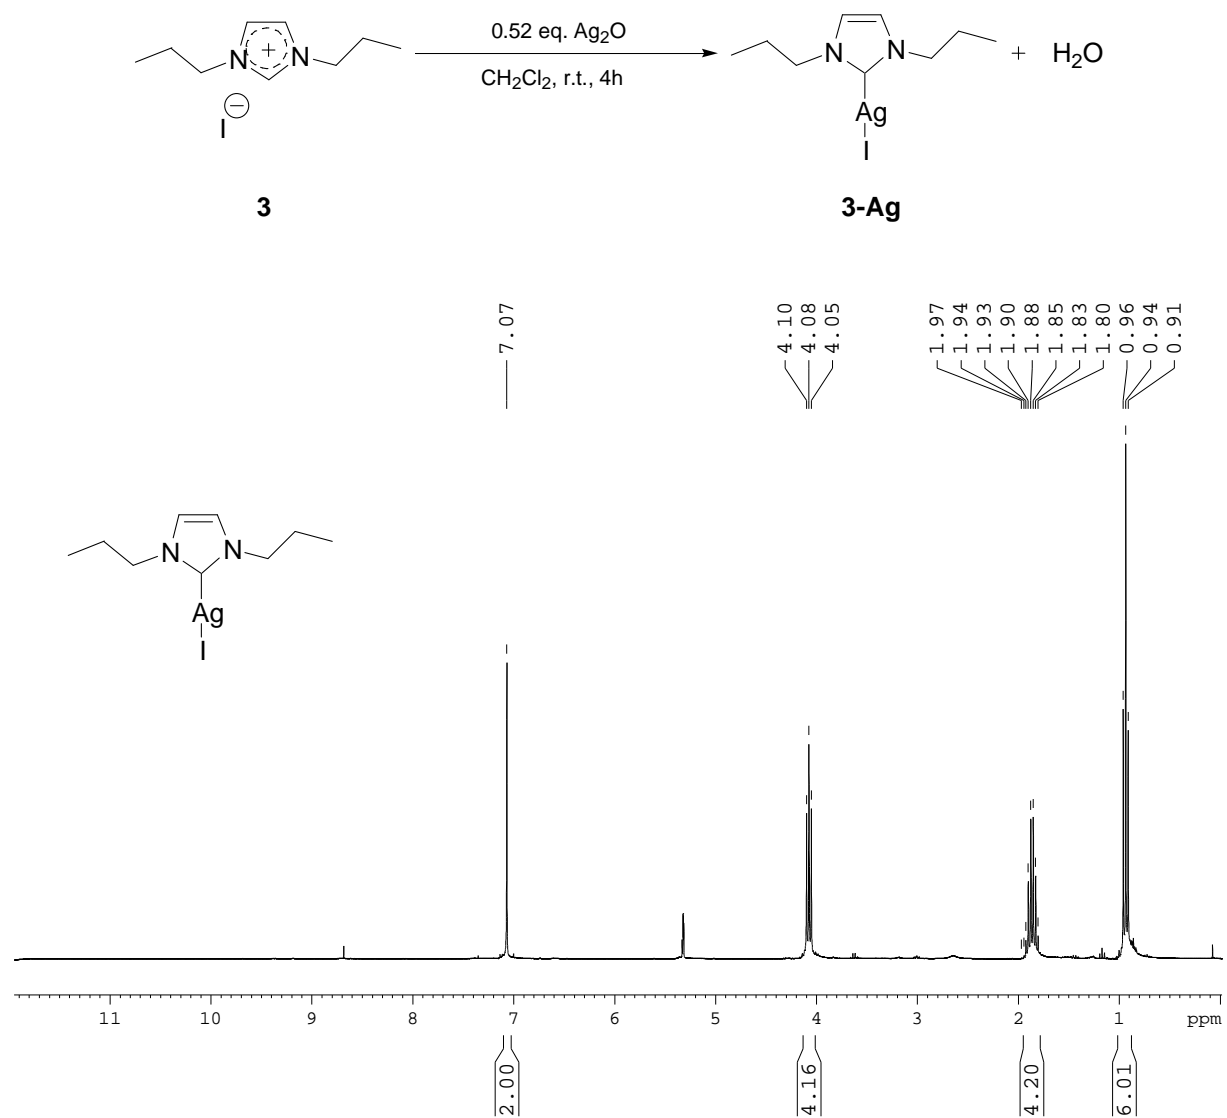

Figure S16 : <sup>1</sup>H NMR spectra of 3-Ag.



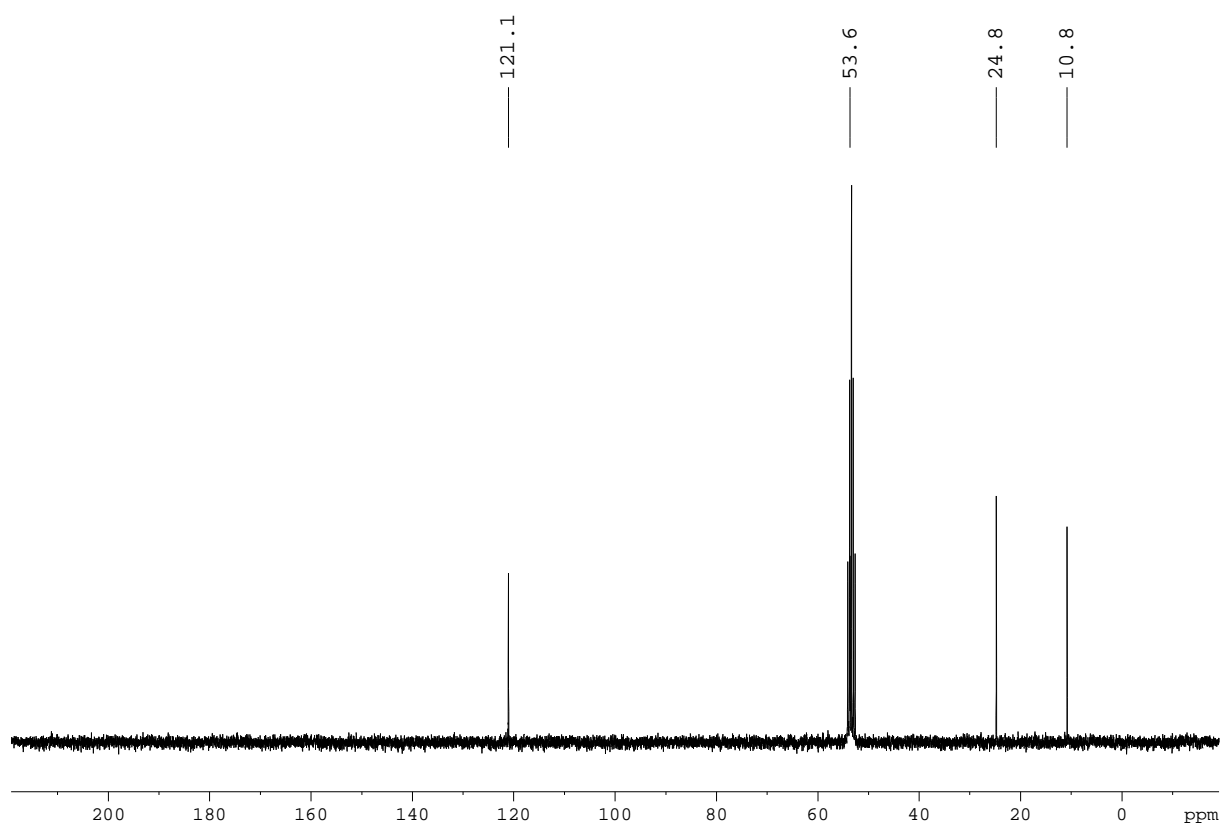

Figure S17 :  $^{13}\text{C}$  NMR spectra of 3-Ag.

### Synthesis of Gold (N,N'-bis(propyl)imidazol-2-ylidene) iodide [3-Au]

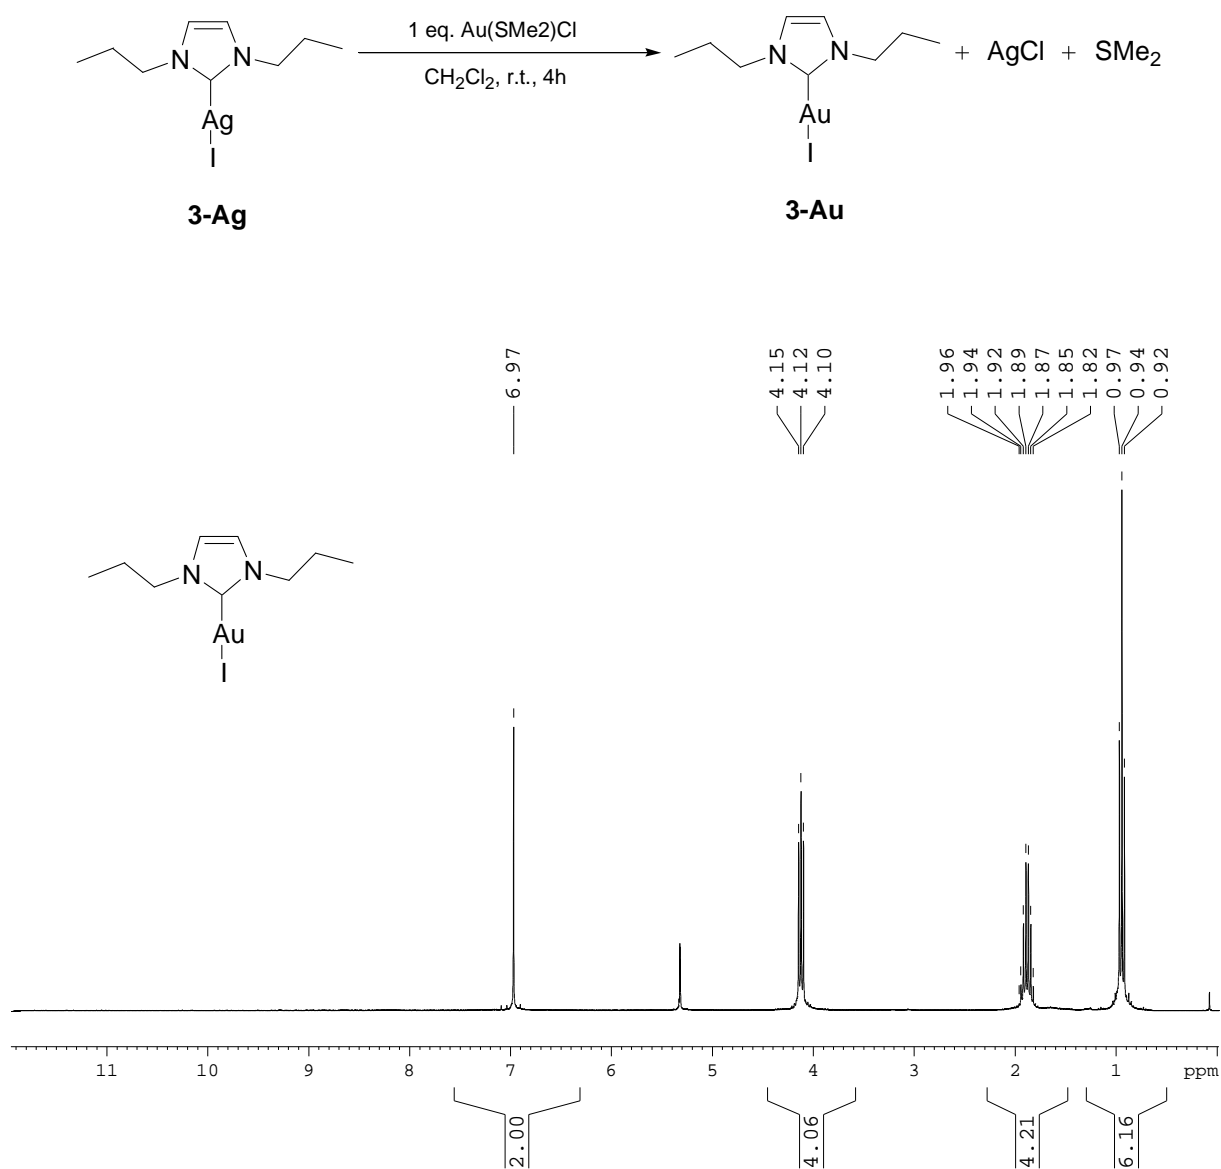

Figure S18 : <sup>1</sup>H NMR spectra of 3-Au.

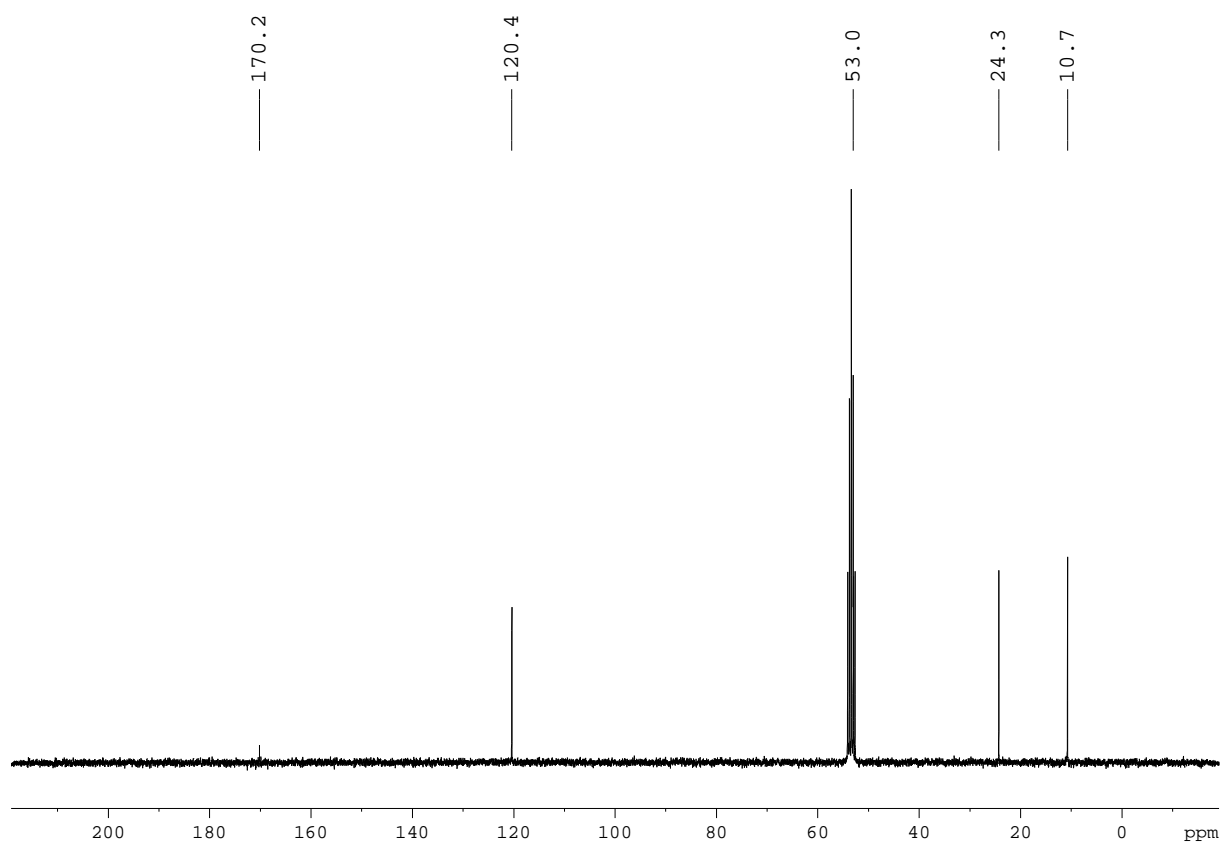

Figure S19 :  $^{13}\text{C}$  NMR spectra of 3-Au.

### Synthesis of N,N'-bis(benzyl)imidazolium chloride [4]

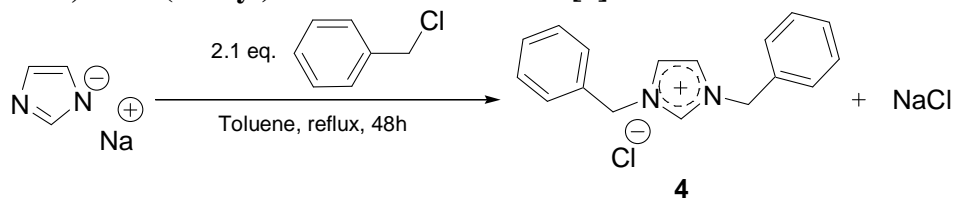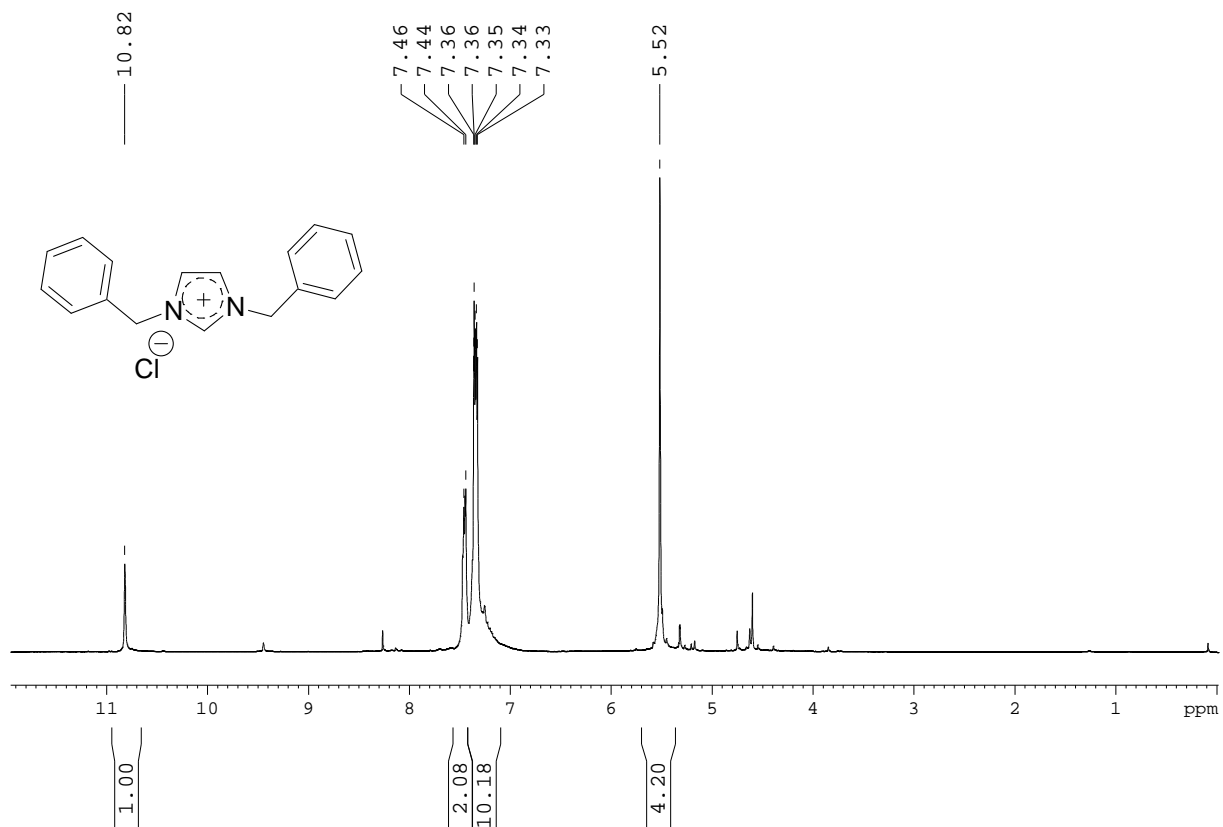

Figure S20 : <sup>1</sup>H NMR spectra of 4.

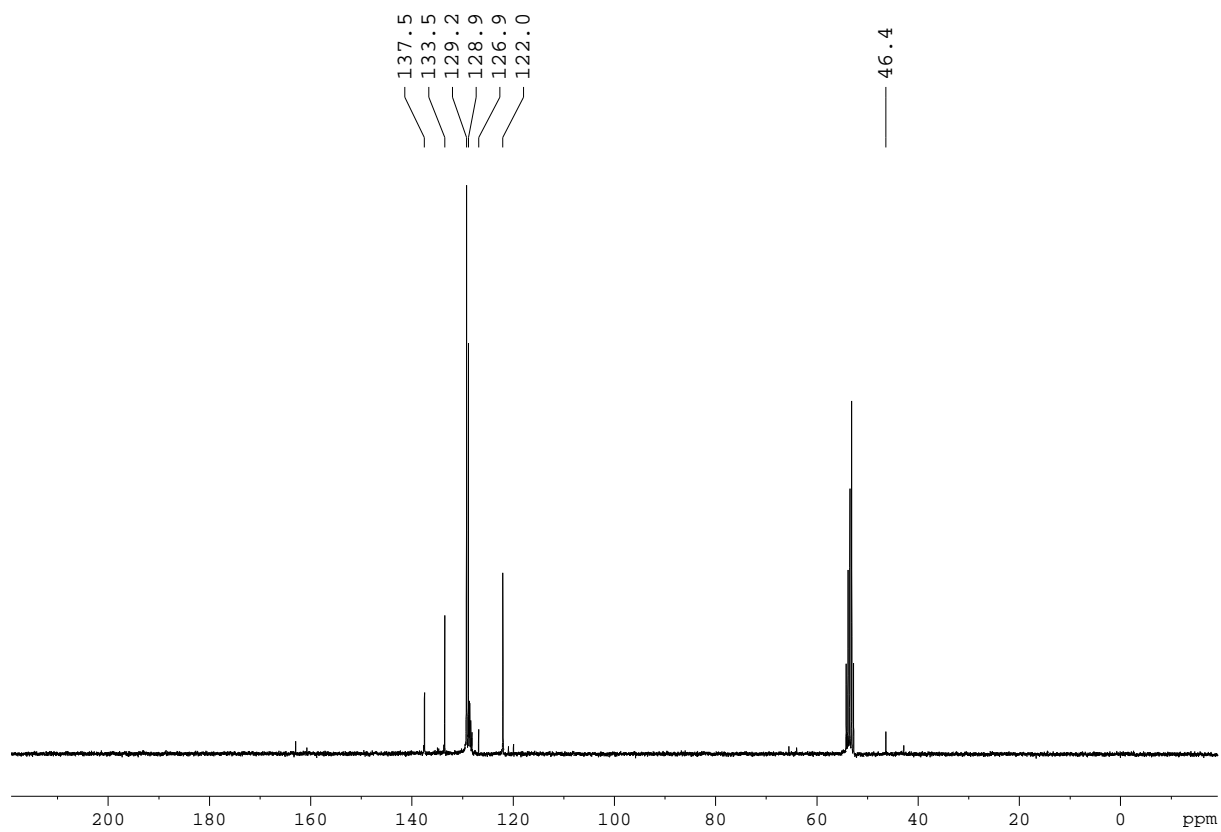

Figure S21 :  $^{13}\text{C}$  NMR spectra of 4.

### Synthesis of Silver (N,N-bis(benzyl)imidazol-2-ylidene) chloride [4-Ag]

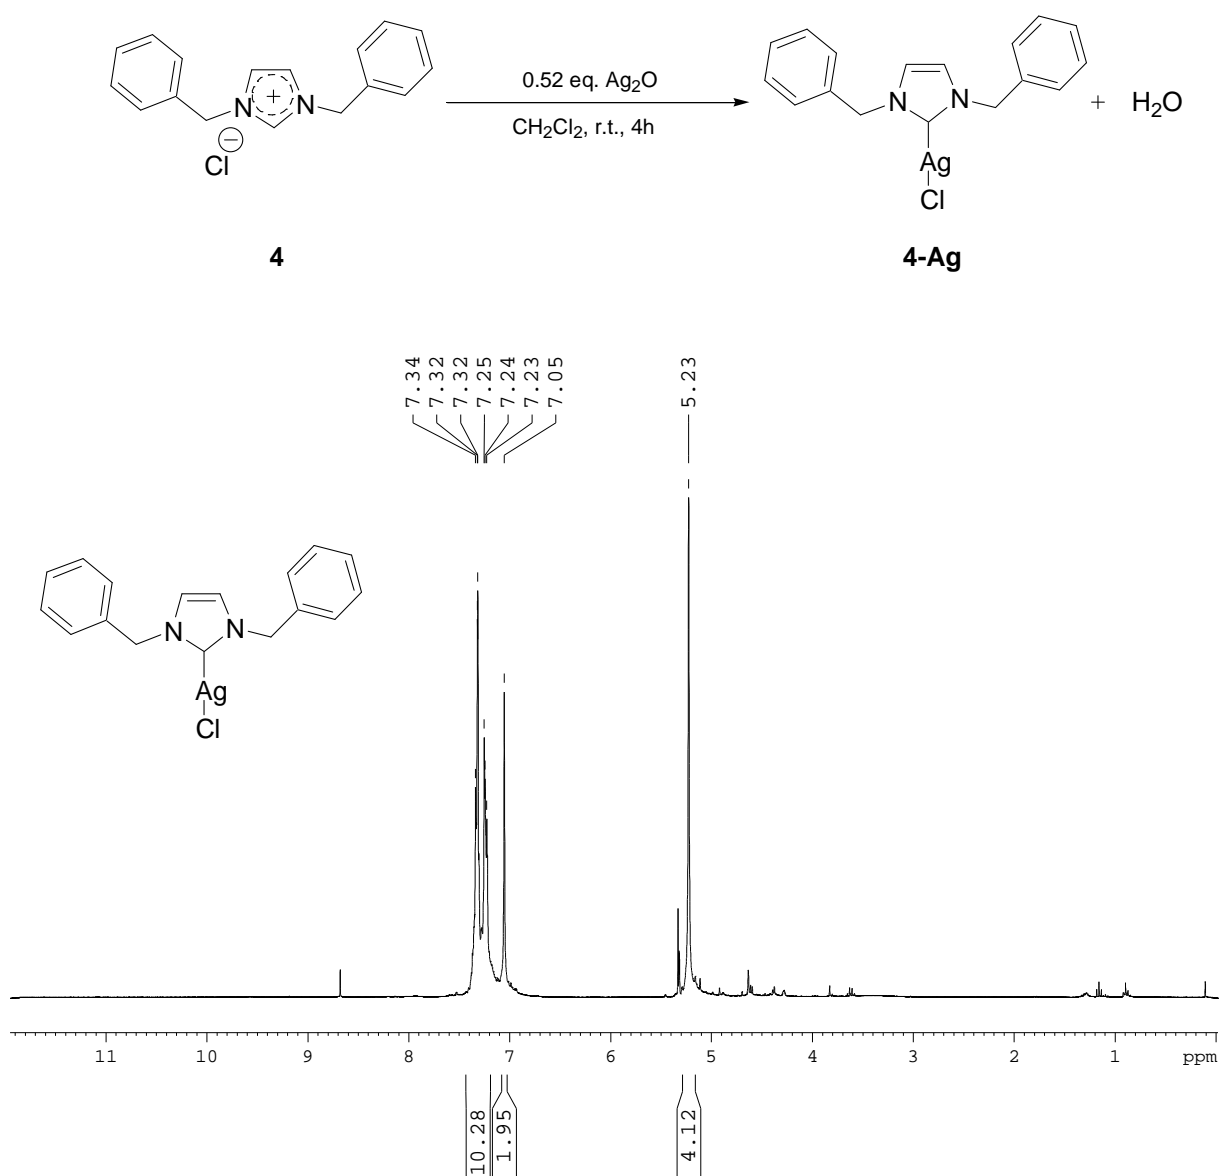

Figure S22 :  $^1\text{H}$  NMR spectra of 4-Ag.

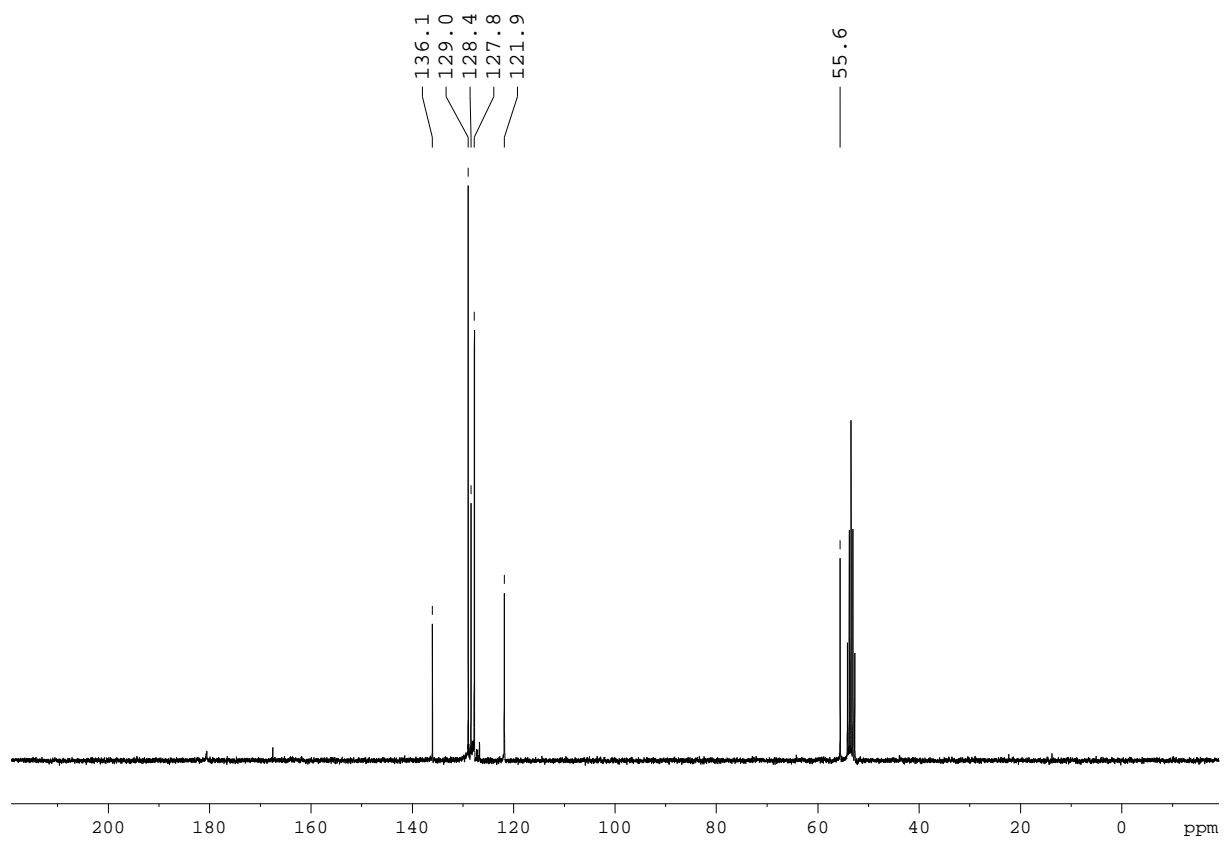

Figure S23 :  $^{13}\text{C}$  NMR spectra of 4-Ag.

### Synthesis of Gold (N,N-bis(benzyl)imidazol-2-ylidene) chloride [4-Au]

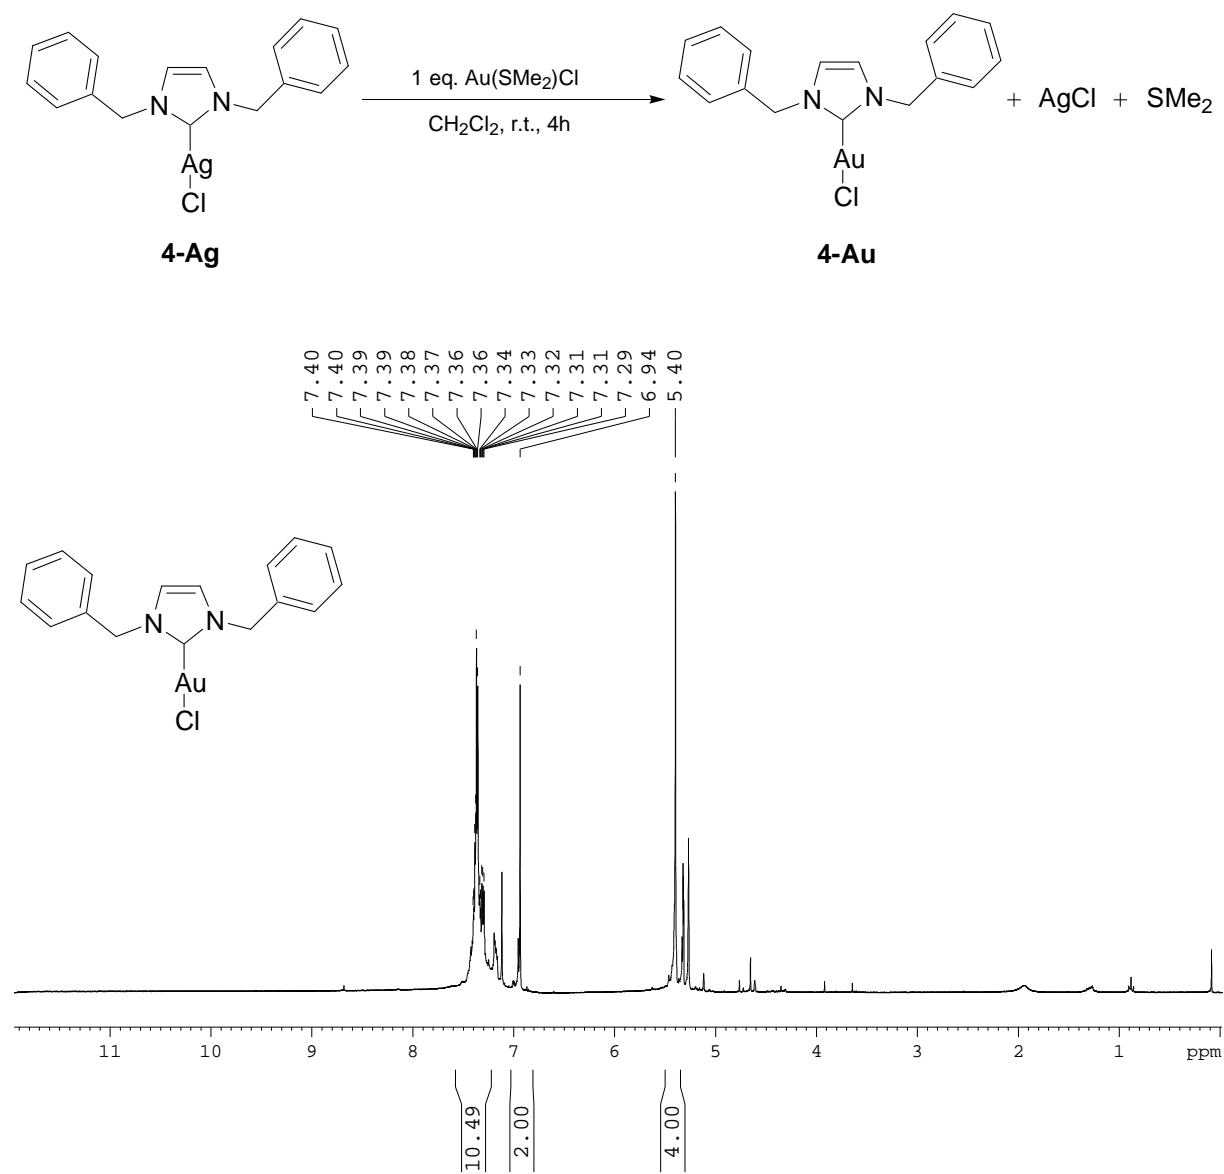

Figure S24 : <sup>1</sup>H NMR spectra of 4-Au.



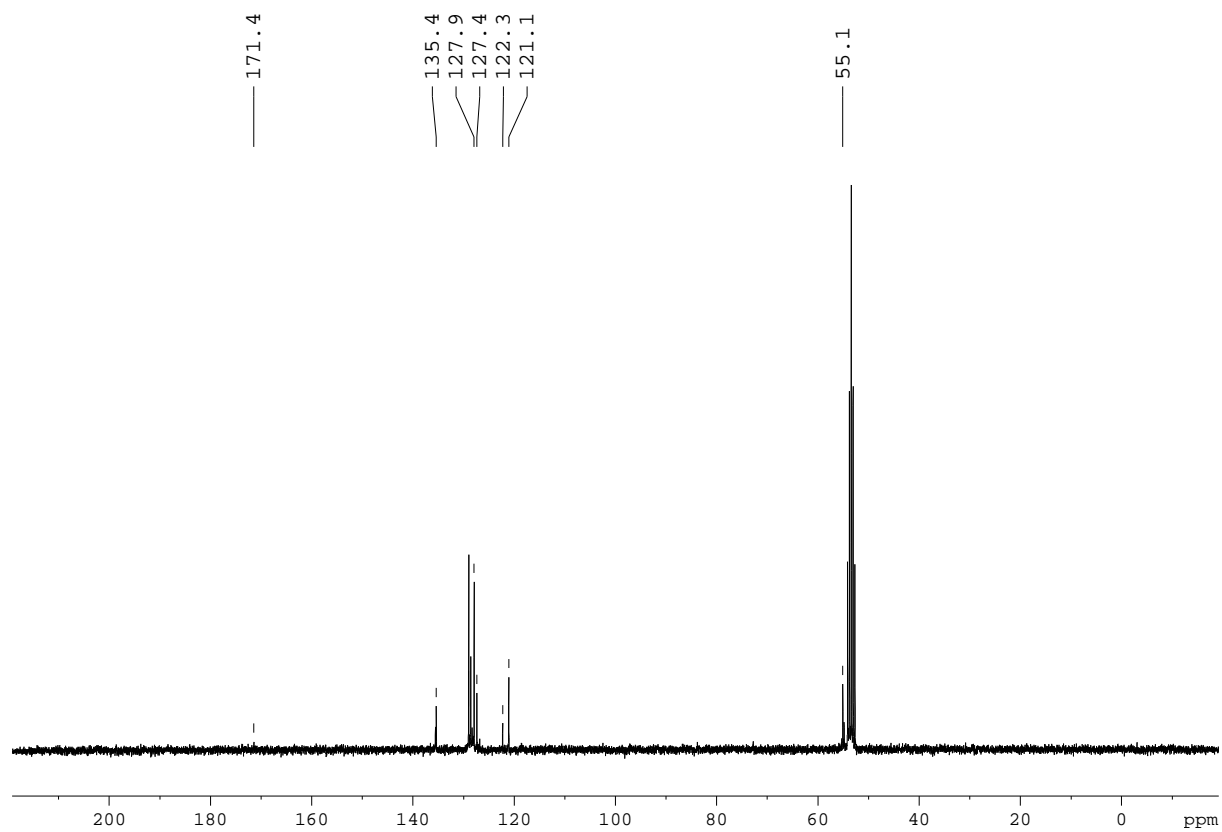

Figure S25 :  $^{13}\text{C}$  NMR spectra of 4-Au.

## Homogeneous catalysis

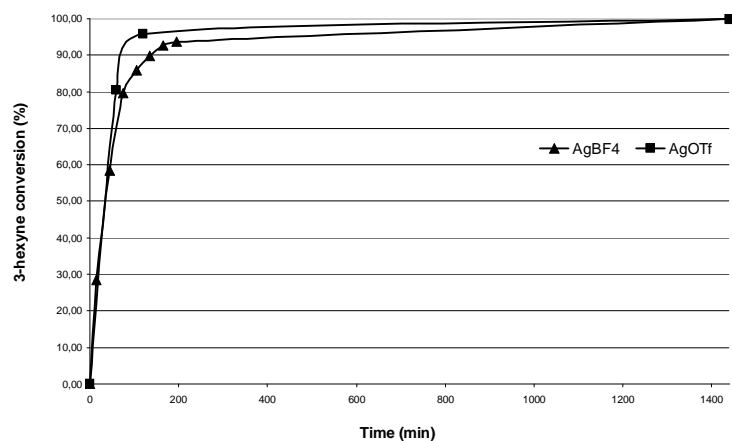

Figure S26 : 3-hexyne conversion versus time using 0,4 mol% Au (Table V.1, entries 3 and 4).

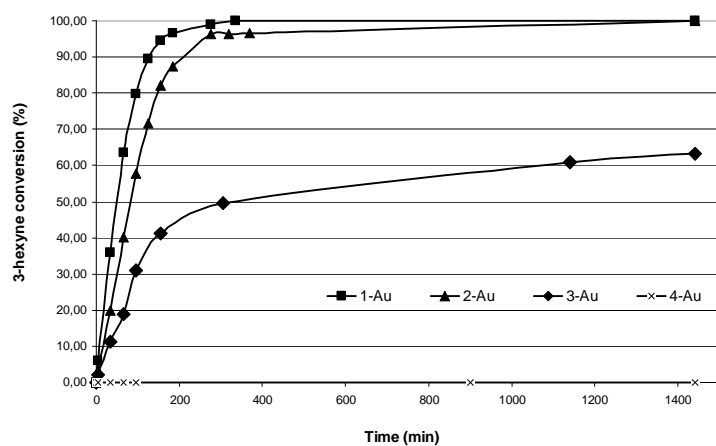

Figure S27 : 3-hexyne conversion versus time using 0,01 mol% Au (Table V.1, entries 7, 8, 9 and 10).

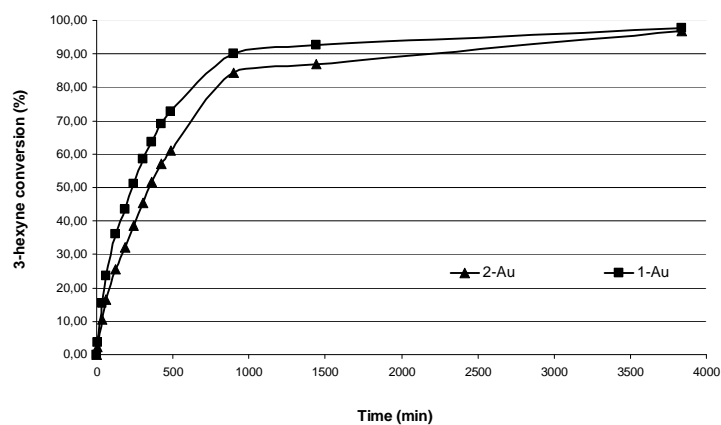

Figure S28 : 3-hexyne conversion versus time using 0,001 mol% Au (Table V.1, entries 13 and 14).

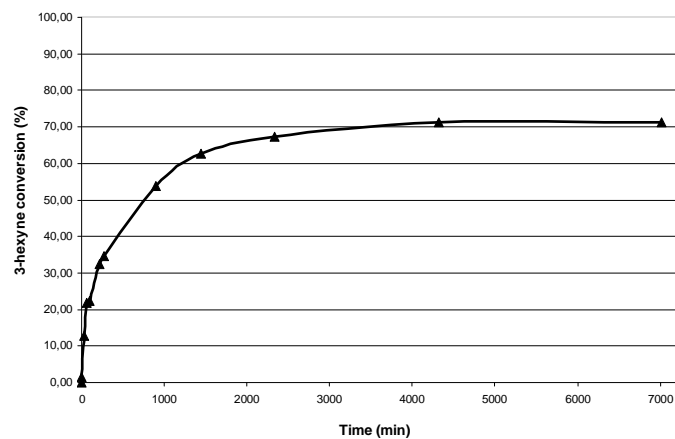

Figure S29 : 3-hexyne conversion versus time using 0,0001 mol% Au (Table V.1, entry 16).

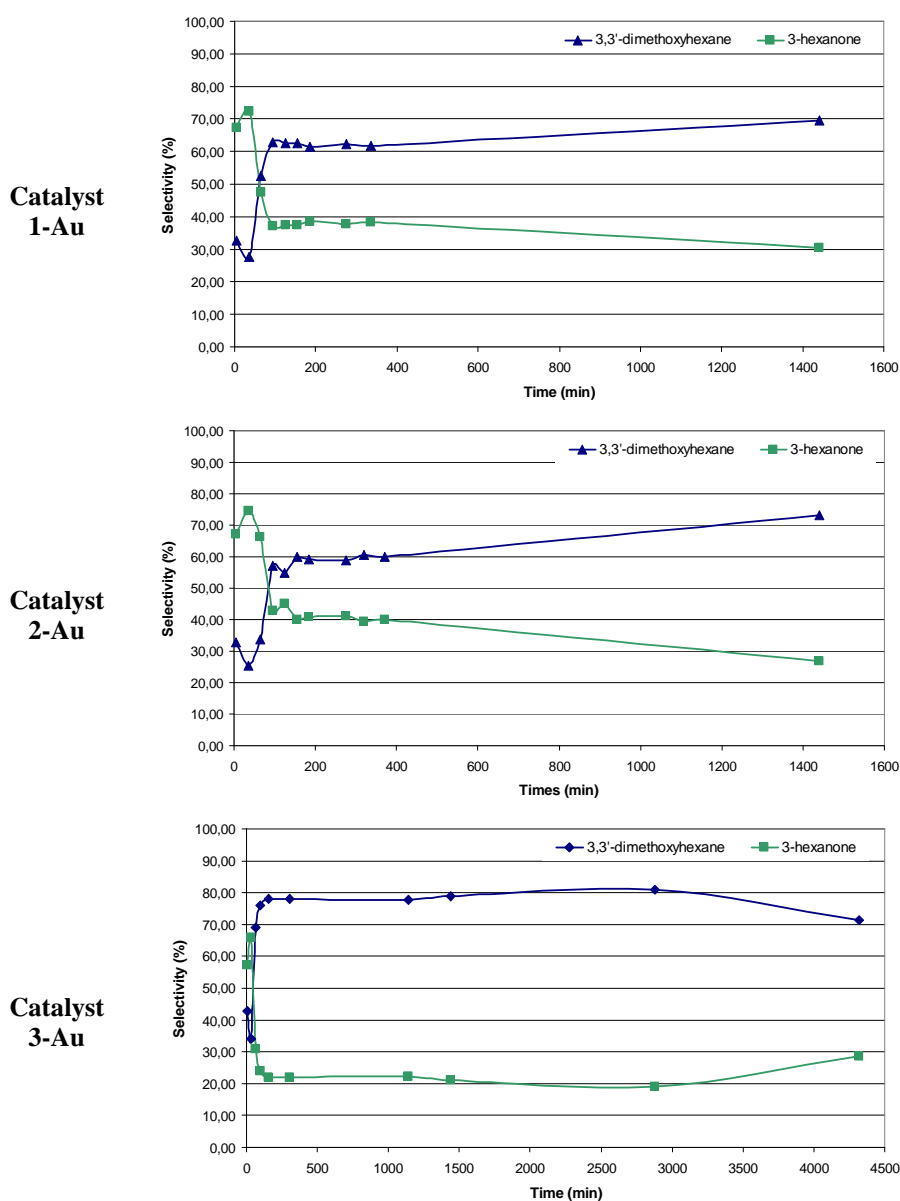

Figure S30 : Products selectivity versus time using 0,01 mol% Au (Table V.1, entries 7, 8 and 9).

**Catalyst  
1-Au**

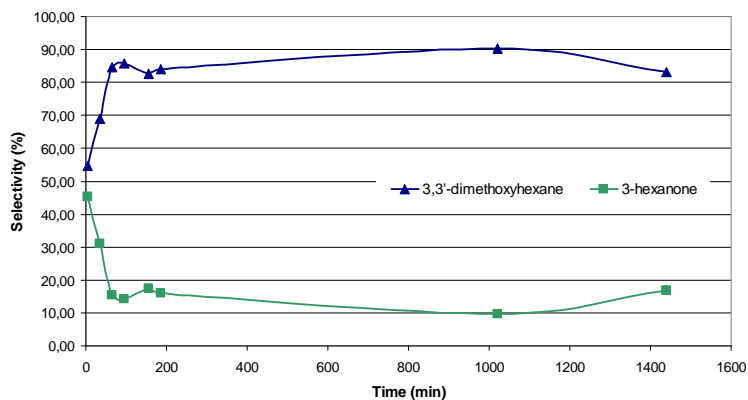

**Catalyst  
2-Au**

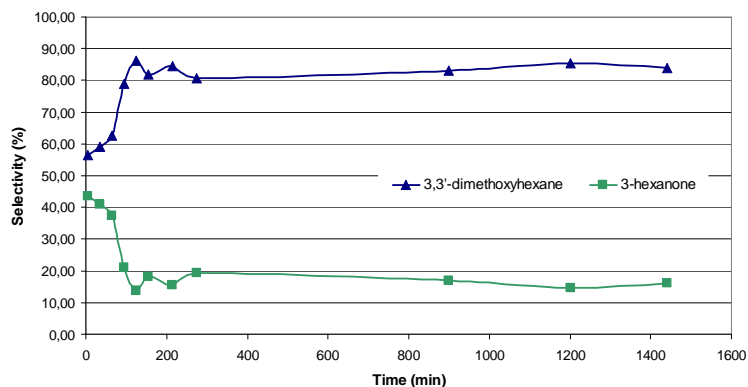

**Figure S31 : Products selectivity versus time using 0,01 mol% Au (Table V.1, entries 11 and 12).**

**Catalyst  
1-Au**

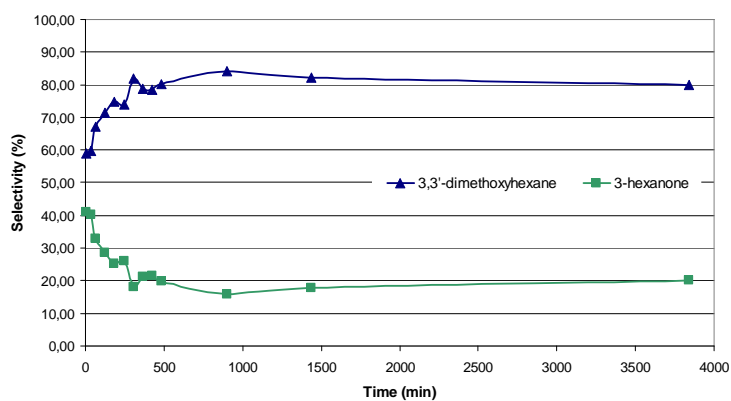

**Catalyst  
2-Au**

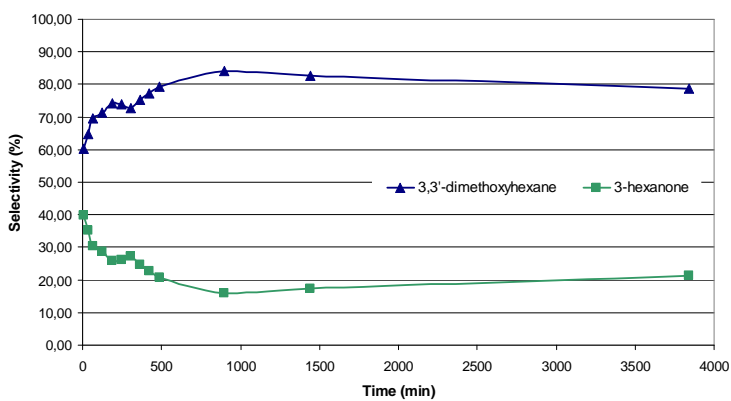

**Figure S32 : Products selectivity versus time using 0,001 mol% Au (Table V.1, entries 13 and 14).**

**Catalyst  
1-Au**

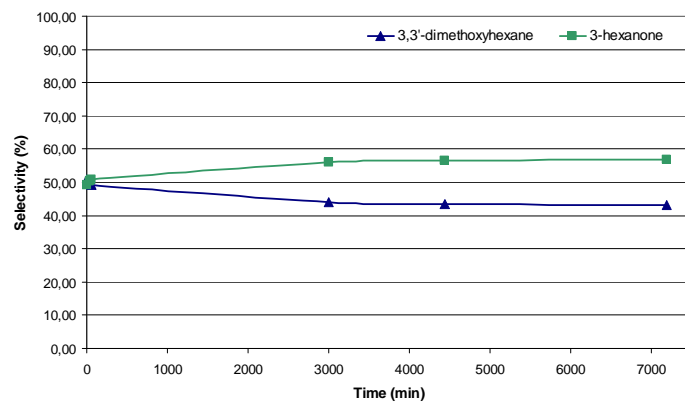

**Catalyst  
2-Au**

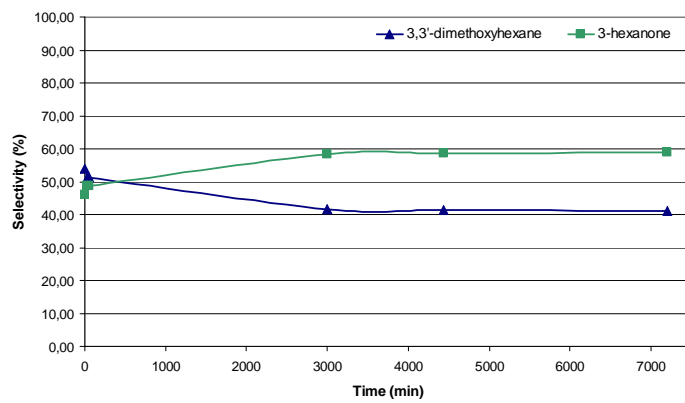

**Figure S33 : Products selectivity versus time using 0,0001 mol% Au (Table V.1, entries 15 and 16).**
